# Supplementary material for: Electronic relaxation dynamics in [Au25(SR)18]−1 (R = CH3, C2H5, C3H7, MPA, PET) thiolate-protected nanoclusters
Source: Royal Society of Chemistry journal article supplement (doi:10.1039/c9cp04039k), 2020-01-01
Supplement: c9cp04039k1.pdf [file c9cp04039k1.pdf]

**Supporting Information**

**Electronic relaxation dynamics in  $[\text{Au}_{25}(\text{SR})_{18}]^{-1}$  (R = CH<sub>3</sub>, C<sub>2</sub>H<sub>5</sub>, C<sub>3</sub>H<sub>7</sub>, MPA, PET)  
thiolate-protected nanoclusters**

*Ravithree D. Senanayake and Christine M. Aikens\**

<sup>†</sup>Department of Chemistry, Kansas State University, Manhattan, KS 66506, USA

\* cmaikens@ksu.edu, 1-785-532-0954, fax: 1-785-532-6666

The electronic structure of the R=MPA system has a different pattern of excitations compared to R=H, CH<sub>3</sub>, C<sub>2</sub>H<sub>5</sub>, C<sub>3</sub>H<sub>7</sub>. In R=MPA, the first excitation is mainly constructed from a HOMO → LUMO transition (S<sub>1</sub> state) which has a high weight (0.8587). Likewise, excited states 4, 5 and 6 also have one transition which has a high weight and they directly resemble the S<sub>4</sub>, S<sub>5</sub> and S<sub>6</sub> states, respectively, that were defined for the FSSH-TDKS calculations. The other ligand systems' excited states are a mix of several excitations based on their weights as shown in Table S1 below.

**Table S1.** The TDDFT excitations, energy, oscillator strength, weights and most weighted transitions involved in the ~1.35 eV peak of the  $[\text{Au}_{25}(\text{SR})_{18}]^{-1}$  (R = CH<sub>3</sub>, C<sub>2</sub>H<sub>5</sub>, C<sub>3</sub>H<sub>7</sub>, MPA, PET) clusters.

| Excited states for R= CH <sub>3</sub> | Energy (eV) | Oscillator strength | Weight | Most weighted transitions |
|---------------------------------------|-------------|---------------------|--------|---------------------------|
| 4                                     | 1.34        | 0.0217              | 0.5339 | HOMO → LUMO+1             |
|                                       |             |                     | 0.1832 | HOMO-1 → LUMO             |
|                                       |             |                     | 0.1519 | HOMO-2 → LUMO             |
|                                       |             |                     | 0.0943 | HOMO → LUMO               |
|                                       |             |                     | 0.0122 | HOMO-1 → LUMO+1           |
| 5                                     | 1.35        | 0.0230              | 0.6838 | HOMO-1 → LUMO             |
|                                       |             |                     | 0.2163 | HOMO → LUMO+1             |
|                                       |             |                     | 0.0418 | HOMO-1 → LUMO+1           |
|                                       |             |                     | 0.027  | HOMO → LUMO               |
| 6                                     | 1.37        | 0.0228              | 0.8776 | HOMO-2 → LUMO+1           |
|                                       |             |                     | 0.0544 | HOMO → LUMO               |
|                                       |             |                     | 0.0251 | HOMO-2 → LUMO             |
|                                       |             |                     | 0.0101 | HOMO → LUMO+1             |

| Excited states for R= C <sub>2</sub> H <sub>5</sub> | Energy (eV) | Oscillator strength | Weight | Most weighted transitions |
|-----------------------------------------------------|-------------|---------------------|--------|---------------------------|
| 4                                                   | 1.36        | 0.0235              | 0.5041 | HOMO → LUMO+1             |
|                                                     |             |                     | 0.2451 | HOMO-2 → LUMO             |
|                                                     |             |                     | 0.1611 | HOMO → LUMO               |
|                                                     |             |                     | 0.0345 | HOMO-1 → LUMO+1           |
|                                                     |             |                     | 0.0249 | HOMO-1 → LUMO             |
| 5                                                   | 1.37        | 0.0245              | 0.4358 | HOMO-1 → LUMO             |
|                                                     |             |                     | 0.2659 | HOMO-2 → LUMO             |
|                                                     |             |                     | 0.2327 | HOMO → LUMO+1             |
|                                                     |             |                     | 0.0234 | HOMO-1 → LUMO+1           |
|                                                     |             |                     | 0.0144 | HOMO → LUMO               |
| 6                                                   | 1.39        | 0.0252              | 0.6122 | HOMO-2 → LUMO+1           |
|                                                     |             |                     | 0.2615 | HOMO-1 → LUMO+1           |
|                                                     |             |                     | 0.0586 | HOMO → LUMO               |
|                                                     |             |                     | 0.0329 | HOMO-2 → LUMO             |

| <b>Excited states<br/>for R= C<sub>3</sub>H<sub>7</sub></b> | <b>Energy (eV)</b> | <b>Oscillator<br/>strength</b> | <b>Weight</b> | <b>Most weighted transitions</b> |
|-------------------------------------------------------------|--------------------|--------------------------------|---------------|----------------------------------|
| 4                                                           | 1.35               | 0.0244                         | 0.4485        | HOMO → LUMO+1                    |
|                                                             |                    |                                | 0.2191        | HOMO → LUMO                      |
|                                                             |                    |                                | 0.2174        | HOMO-2 → LUMO                    |
| 5                                                           | 1.36               | 0.0261                         | 0.3531        | HOMO-1 → LUMO                    |
|                                                             |                    |                                | 0.3345        | HOMO-2 → LUMO                    |
|                                                             |                    |                                | 0.2366        | HOMO → LUMO+1                    |
| 6                                                           | 1.38               | 0.0269                         | 0.6256        | HOMO-2 → LUMO+1                  |
|                                                             |                    |                                | 0.2556        | HOMO-1 → LUMO+1                  |

| Excited states for R= MPA | Energy (eV) | Oscillator strength | Weight | Most weighted transitions |
|---------------------------|-------------|---------------------|--------|---------------------------|
| 1                         | 1.13        | 0.0131              | 0.8587 | HOMO → LUMO               |
|                           |             |                     | 0.0699 | HOMO → LUMO+1             |
|                           |             |                     | 0.0222 | HOMO-2 → LUMO             |
|                           |             |                     | 0.0172 | HOMO-1 → LUMO             |
|                           |             |                     | 0.0137 | HOMO-1 → LUMO+1           |
| 2                         | 1.14        | 0.0012              | 0.7229 | HOMO-1 → LUMO             |
|                           |             |                     | 0.2606 | HOMO → LUMO+1             |
|                           |             |                     | 0.0118 | HOMO-1 → LUMO+1           |
| 3                         | 1.16        | 0.0062              | 0.6455 | HOMO → LUMO+1             |
|                           |             |                     | 0.2313 | HOMO-1 → LUMO             |
|                           |             |                     | 0.0900 | HOMO → LUMO               |
|                           |             |                     | 0.0164 | HOMO-2 → LUMO+1           |
| 4                         | 1.27        | 0.0220              | 0.9412 | HOMO-1 → LUMO+1           |
|                           |             |                     | 0.0162 | HOMO-1 → LUMO             |
|                           |             |                     | 0.0116 | HOMO → LUMO               |
|                           |             |                     | 0.0071 | HOMO-2 → LUMO             |
|                           |             |                     | 0.0044 | HOMO-2 → LUMO+2           |
| 5                         | 1.31        | 0.0177              | 0.9194 | HOMO-2 → LUMO             |
|                           |             |                     | 0.032  | HOMO-2 → LUMO+1           |

|   |      |        |        |                 |
|---|------|--------|--------|-----------------|
|   |      |        | 0.0143 | HOMO → LUMO     |
|   |      |        | 0.0097 | HOMO-1 → LUMO+1 |
| 6 | 1.38 | 0.0176 | 0.9279 | HOMO-2 → LUMO+1 |
|   |      |        | 0.0301 | HOMO-2 → LUMO   |

| Excited states for R= PET | Energy (eV) | Oscillator strength | Weight | Most weighted transitions |
|---------------------------|-------------|---------------------|--------|---------------------------|
| 4                         | 1.35        | 0.0246              | 0.4067 | HOMO-1 - LUMO             |
|                           |             |                     | 0.3073 | HOMO-1 - LUMO+1           |
|                           |             |                     | 0.1241 | HOMO - LUMO               |
|                           |             |                     | 0.107  | HOMO-2 - LUMO             |
|                           |             |                     | 0.0313 | HOMO - LUMO+1             |
| 5                         | 1.37        | 0.0308              | 0.5929 | HOMO - LUMO+1             |
|                           |             |                     | 0.2286 | HOMO-2 - LUMO             |
|                           |             |                     | 0.0805 | HOMO-1 - LUMO             |
|                           |             |                     | 0.0361 | HOMO - LUMO               |
|                           |             |                     | 0.0267 | HOMO-1 - LUMO+1           |
| 6                         | 1.40        | 0.0305              | 0.8557 | HOMO-2 - LUMO+1           |
|                           |             |                     | 0.0615 | HOMO - LUMO+1             |
|                           |             |                     | 0.0406 | HOMO-1 - LUMO             |

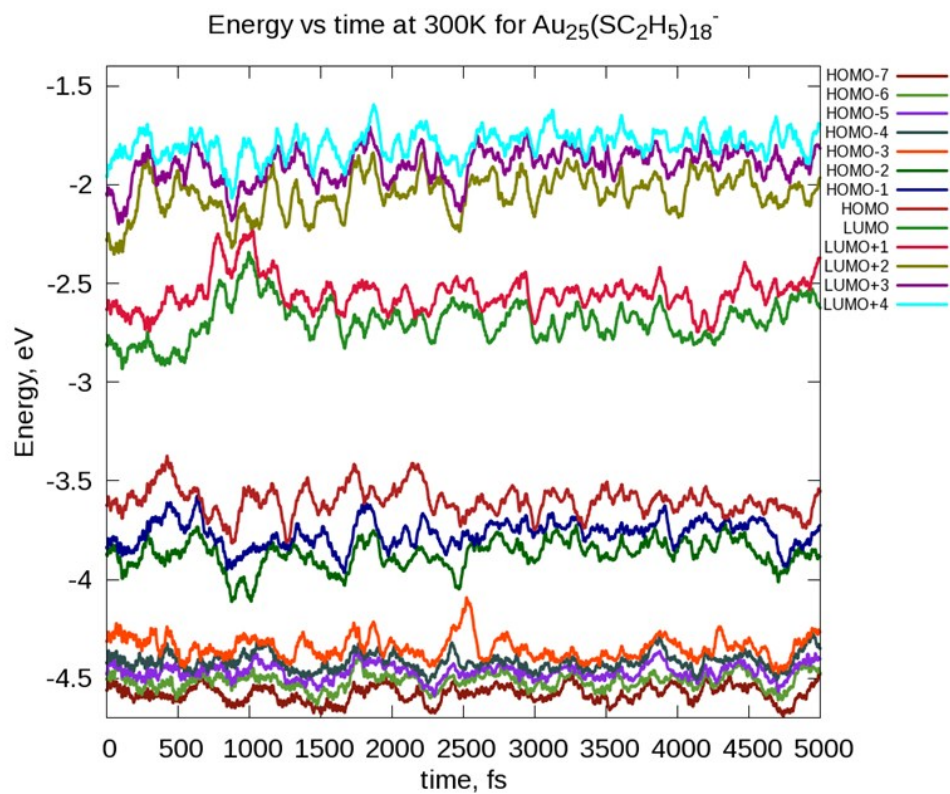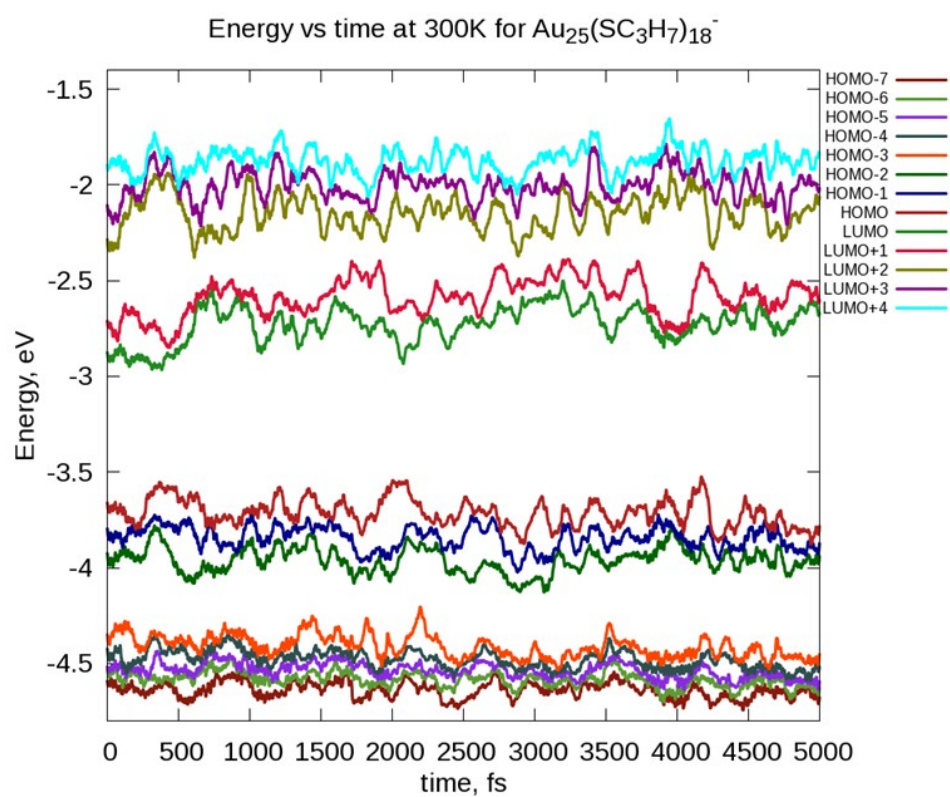

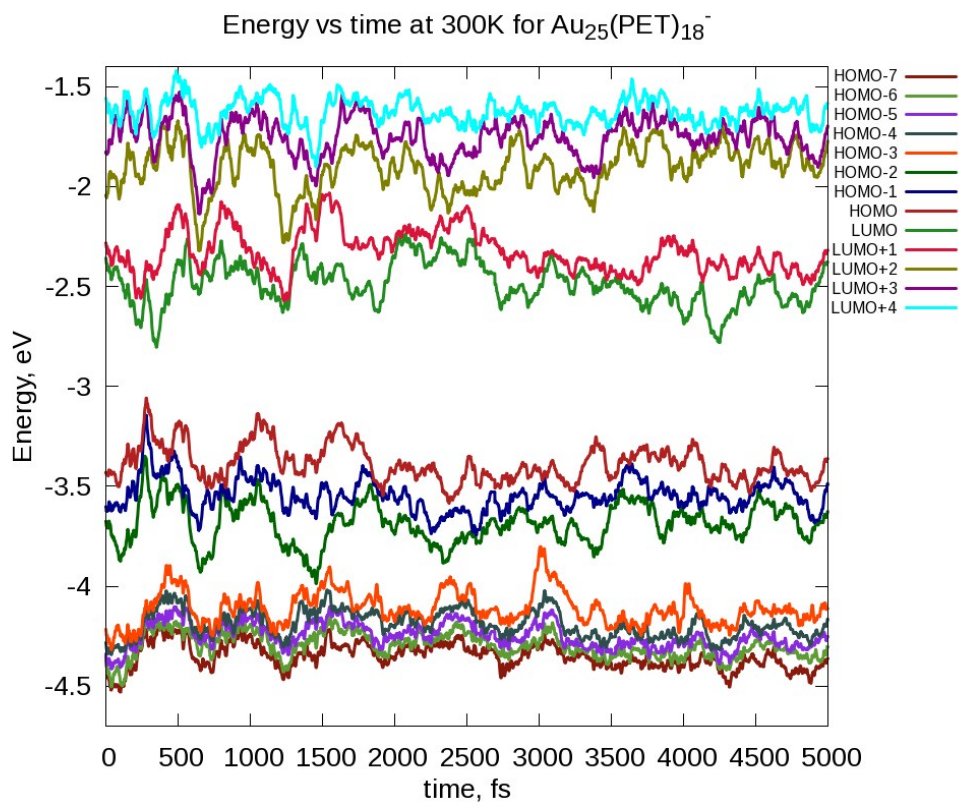

**Figure S1.** Orbital energy variation with time during the MD simulation for [Au<sub>25</sub>(SR)<sub>18</sub>]<sup>-1</sup> (R= C<sub>2</sub>H<sub>5</sub>, C<sub>3</sub>H<sub>7</sub>, PET).



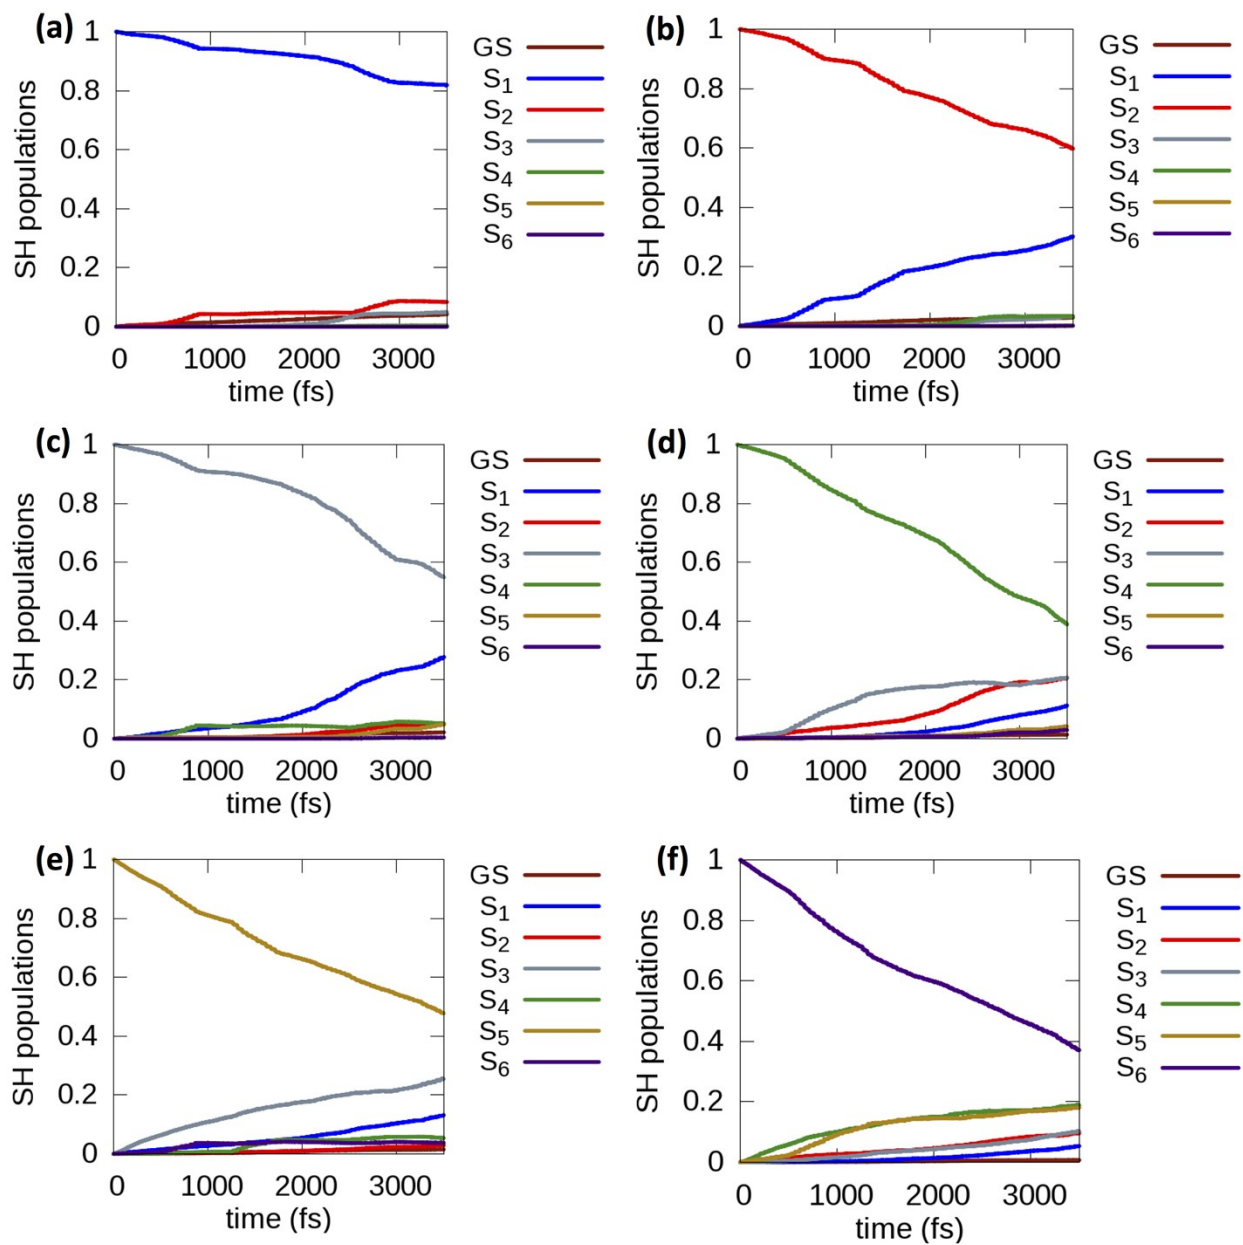

**Figure S2.** Evolution of the populations of S<sub>1</sub>, S<sub>2</sub>, S<sub>3</sub>, S<sub>4</sub>, S<sub>5</sub>, S<sub>6</sub> states. Panels a–f are relaxations from S<sub>1</sub> to S<sub>6</sub>, respectively, with the energy correction for [Au<sub>25</sub>(SCH<sub>3</sub>)<sub>18</sub>]<sup>-1</sup>.

**Table S2.** Individual GS growth and decay time constants, averages, and standard deviations calculated for four different MD simulations for  $[\text{Au}_{25}(\text{SCH}_3)_{18}]^{-1}$ .

| <b>GS growth time (ps)</b> |               |                |                 |                                      |                |                 |
|----------------------------|---------------|----------------|-----------------|--------------------------------------|----------------|-----------------|
| <b>Excited state</b>       | <b>0-5 ps</b> | <b>5-10 ps</b> | <b>10-15 ps</b> | <b>Different temperature ramp MD</b> | <b>Average</b> | <b>Std. Dev</b> |
| <b>S<sub>1</sub></b>       | 24            | 48             | 44              | 56                                   | <b>43</b>      | 14              |
| <b>S<sub>2</sub></b>       | 24            | 64             | 45              | 61                                   | <b>48</b>      | 18              |
| <b>S<sub>3</sub></b>       | 44            | 57             | 38              | 72                                   | <b>53</b>      | 15              |
| <b>S<sub>4</sub></b>       | 65            | 68             | 50              | 73                                   | <b>64</b>      | 10              |
| <b>S<sub>5</sub></b>       | 35            | 84             | 56              | 88                                   | <b>66</b>      | 25              |
| <b>S<sub>6</sub></b>       | 61            | 78             | 54              | 99                                   | <b>73</b>      | 20              |
| <b>Decay time (ps)</b>     |               |                |                 |                                      |                |                 |
| <b>Excited state</b>       | <b>0-5 ps</b> | <b>5-10 ps</b> | <b>10-15 ps</b> | <b>Different temperature ramp MD</b> | <b>Average</b> | <b>Std. Dev</b> |
| <b>S<sub>1</sub></b>       | 12            | 13             | 8               | 13                                   | <b>12</b>      | 2.3             |
| <b>S<sub>2</sub></b>       | 6.0           | 4.4            | 2.7             | 4.3                                  | <b>4.4</b>     | 1.4             |
| <b>S<sub>3</sub></b>       | 7.1           | 3.5            | 2.9             | 5.2                                  | <b>4.7</b>     | 1.9             |
| <b>S<sub>4</sub></b>       | 4.6           | 2.3            | 1.9             | 2.6                                  | <b>2.8</b>     | 1.2             |
| <b>S<sub>5</sub></b>       | 4.3           | 2.5            | 2.4             | 3.5                                  | <b>3.2</b>     | 0.9             |
| <b>S<sub>6</sub></b>       | 3.7           | 1.9            | 1.8             | 2.4                                  | <b>2.4</b>     | 0.9             |

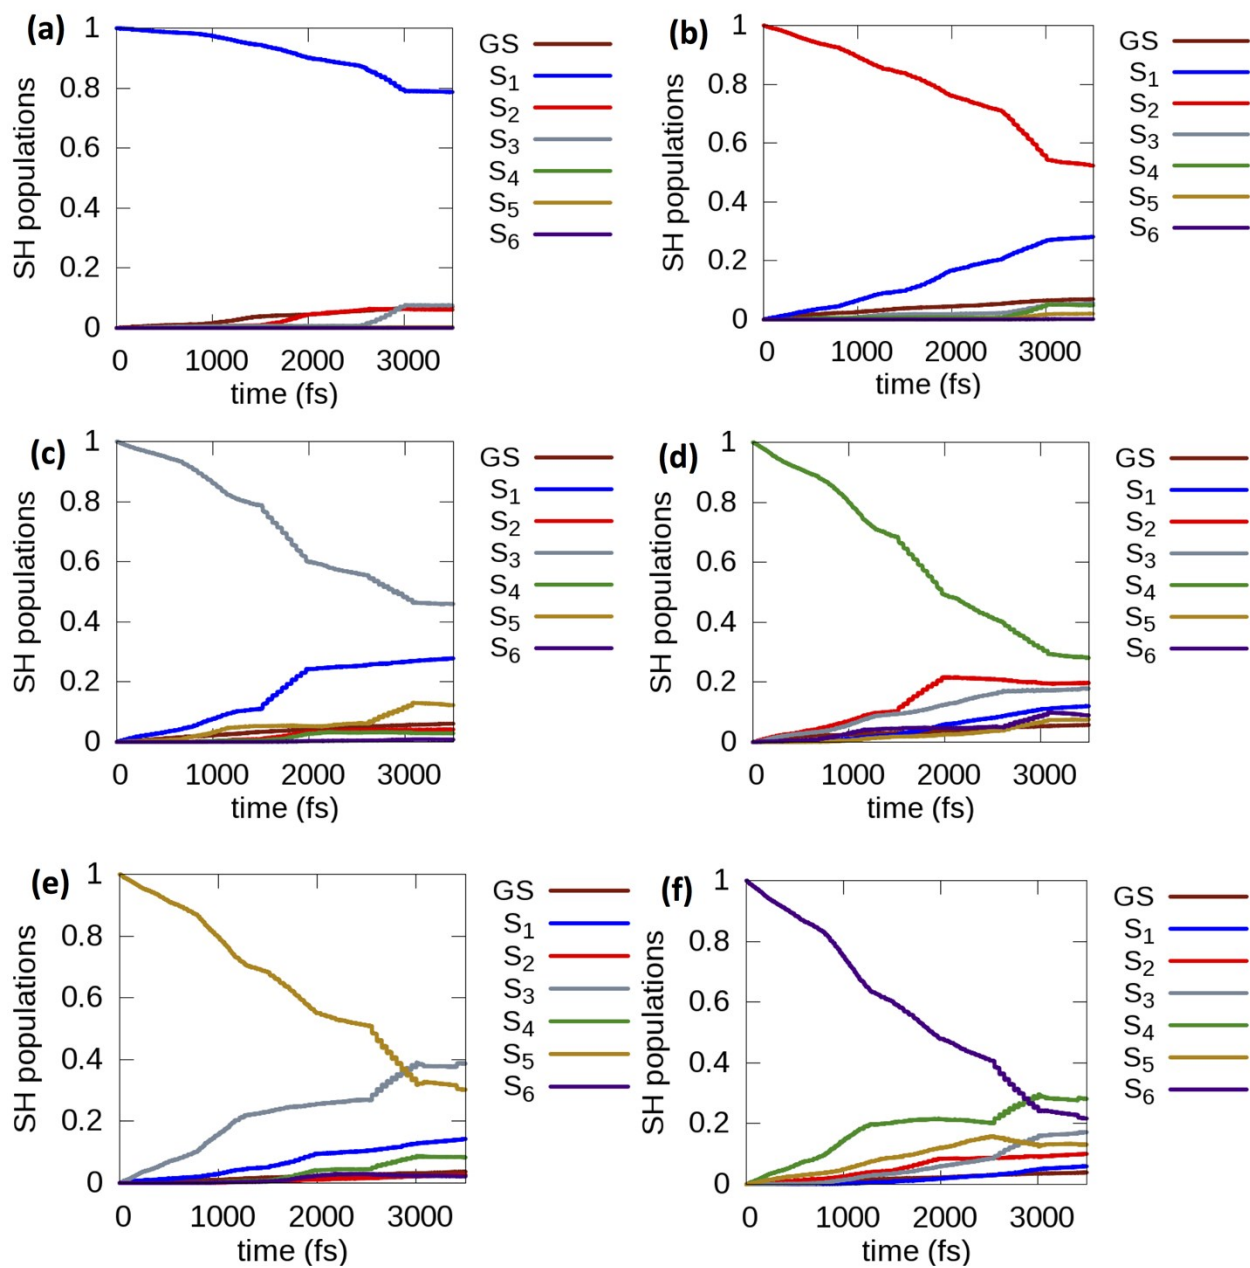

**Figure S3.** Evolution of the populations of the S<sub>1</sub>, S<sub>2</sub>, S<sub>3</sub>, S<sub>4</sub>, S<sub>5</sub>, S<sub>6</sub> states for  $[\text{Au}_{25}(\text{SC}_2\text{H}_5)_{18}]^{-1}$  without the energy correction. Panels a–f are relaxations from S<sub>1</sub> to S<sub>6</sub>, respectively.

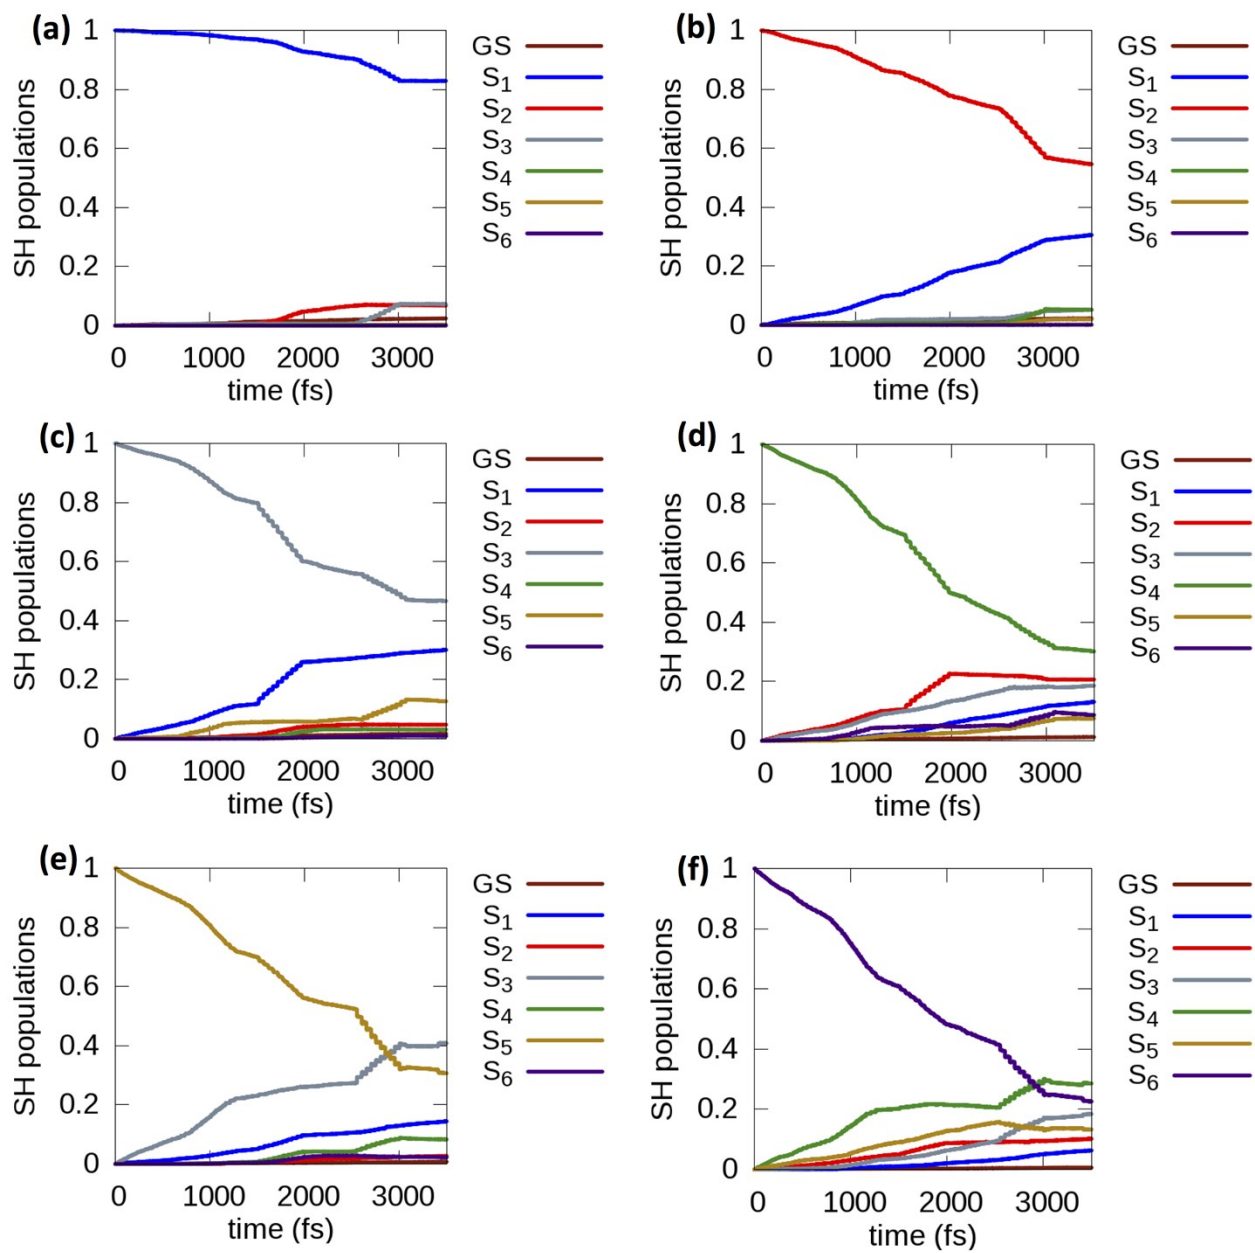

**Figure S4.** Evolution of the populations of the S<sub>1</sub>, S<sub>2</sub>, S<sub>3</sub>, S<sub>4</sub>, S<sub>5</sub>, S<sub>6</sub> states for [Au<sub>25</sub>(SC<sub>2</sub>H<sub>5</sub>)<sub>18</sub>]<sup>-1</sup> with the 0.55 eV energy correction. Panels a–f are relaxations from S<sub>1</sub> to S<sub>6</sub>, respectively.

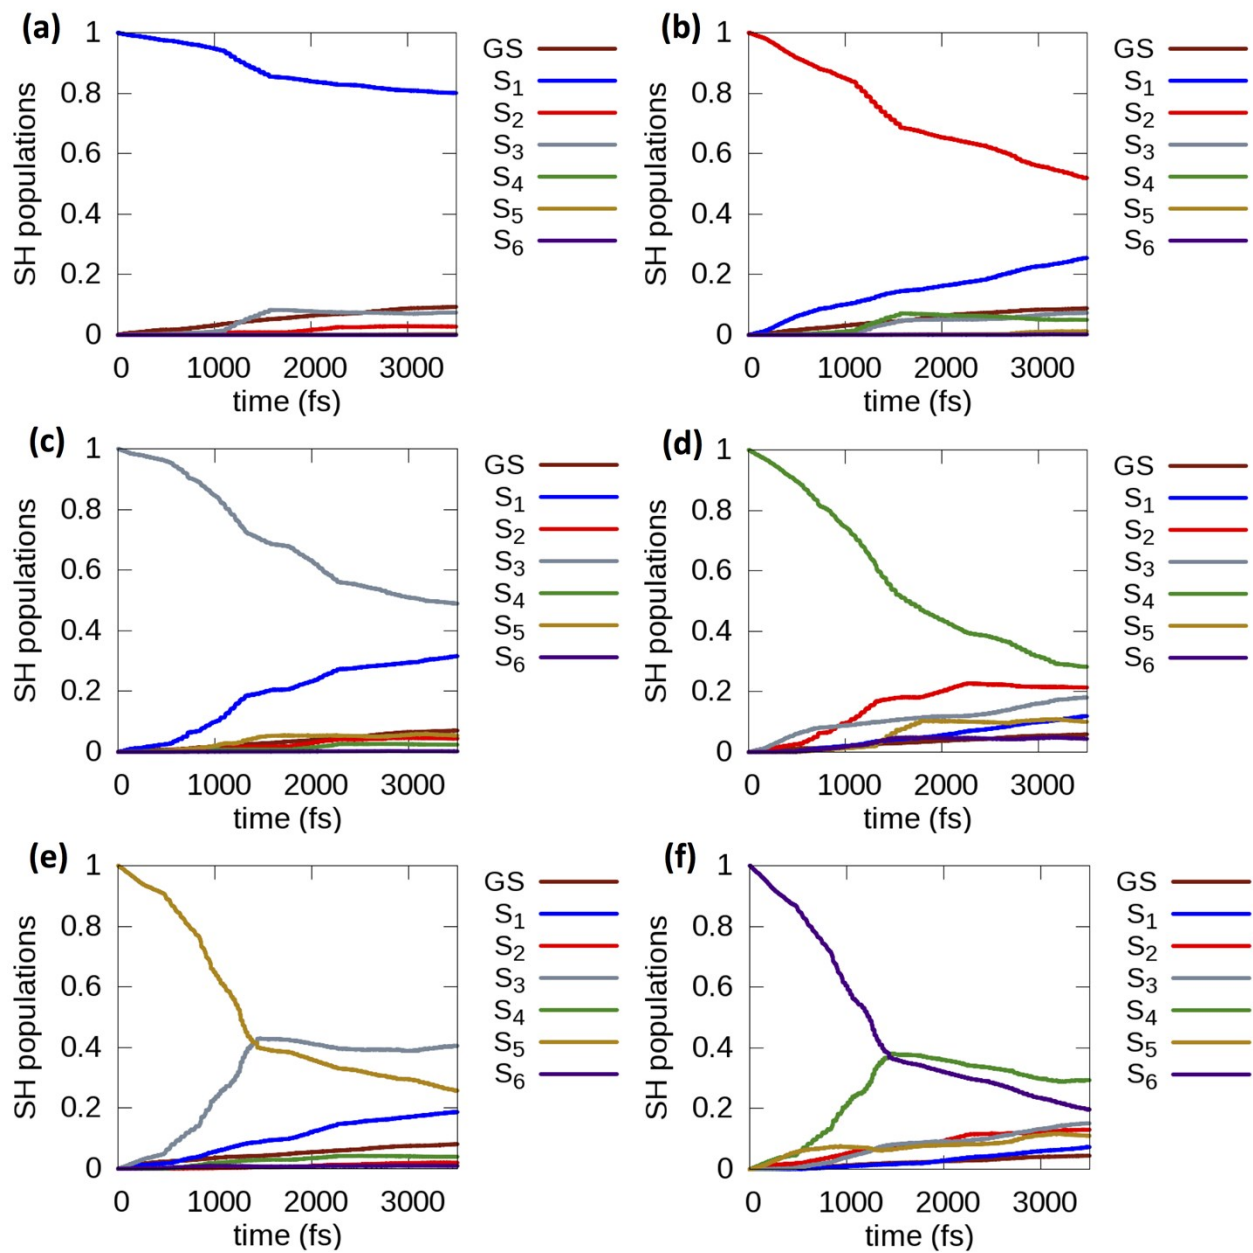

**Figure S5.** Evolution of the populations of the S<sub>1</sub>, S<sub>2</sub>, S<sub>3</sub>, S<sub>4</sub>, S<sub>5</sub>, S<sub>6</sub> states for  $[\text{Au}_{25}(\text{SC}_3\text{H}_7)_{18}]^{-1}$  without the energy correction. Panels a–f are relaxations from S<sub>1</sub> to S<sub>6</sub>, respectively.

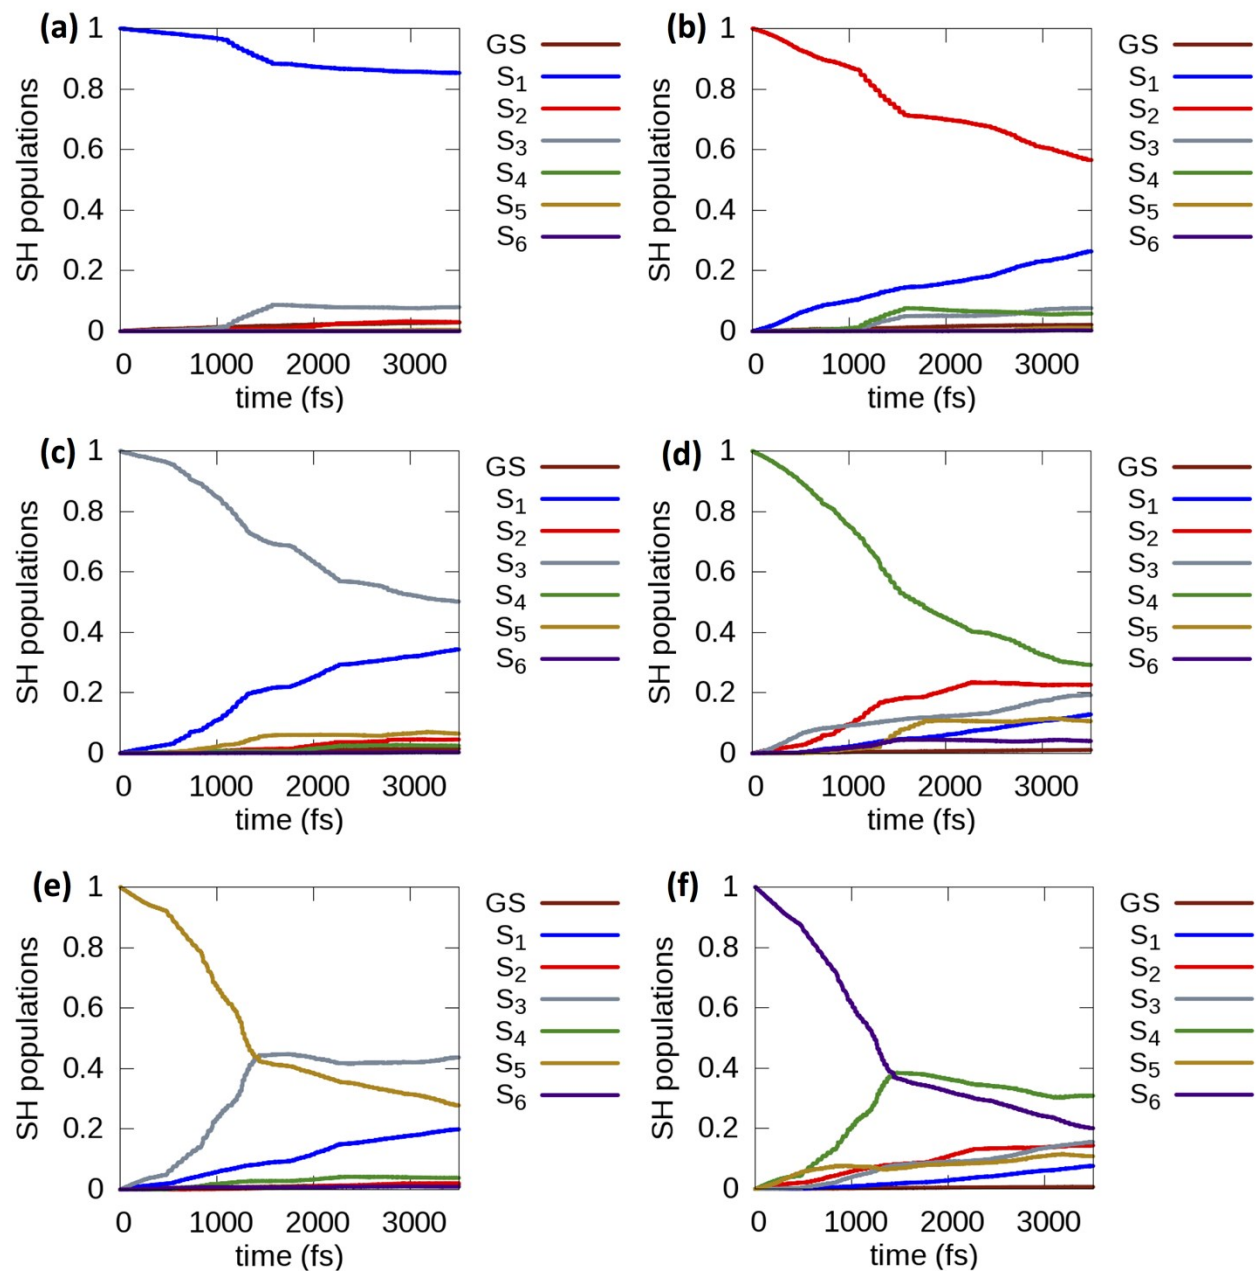

**Figure S6.** Evolution of the populations of the  $S_1$ ,  $S_2$ ,  $S_3$ ,  $S_4$ ,  $S_5$ ,  $S_6$  states for  $[\text{Au}_{25}(\text{SC}_3\text{H}_7)_{18}]^{-1}$  with the 0.55 eV energy correction. Panels a–f are relaxations from  $S_1$  to  $S_6$ , respectively.

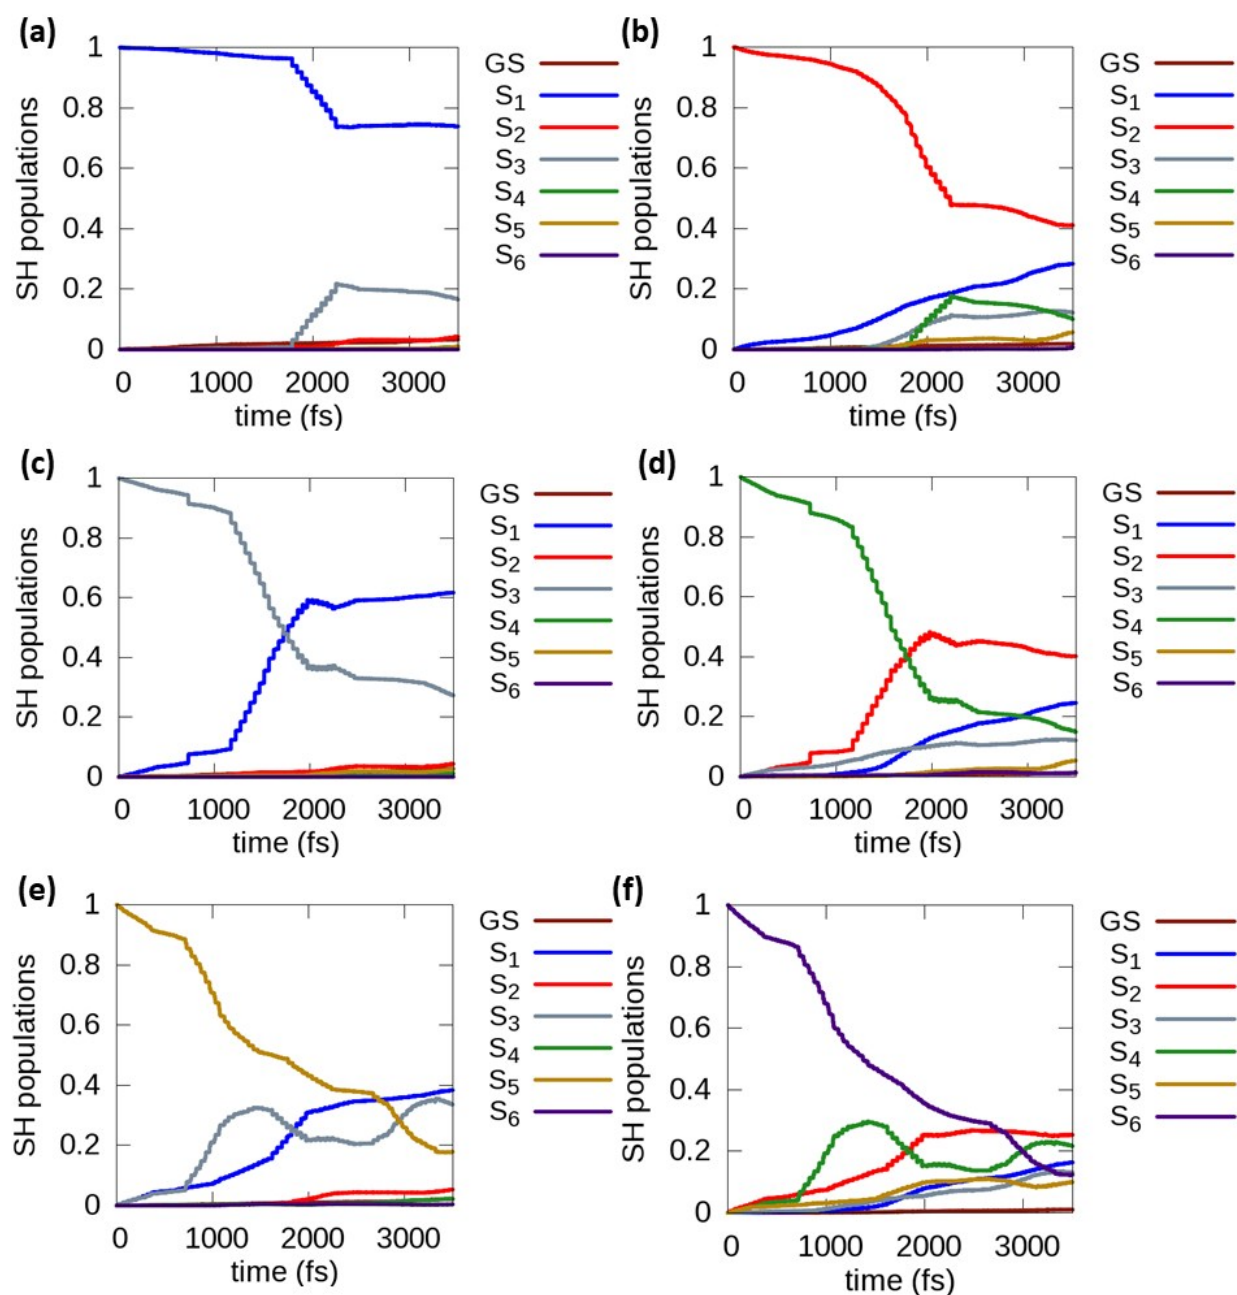

**Figure S7.** Evolution of the populations of the S<sub>1</sub>, S<sub>2</sub>, S<sub>3</sub>, S<sub>4</sub>, S<sub>5</sub>, S<sub>6</sub> states for [Au<sub>25</sub>(MPA)<sub>18</sub>]<sup>-1</sup> with the 0.55 eV energy correction. Panels a–f are relaxations from S<sub>1</sub> to S<sub>6</sub>, respectively.

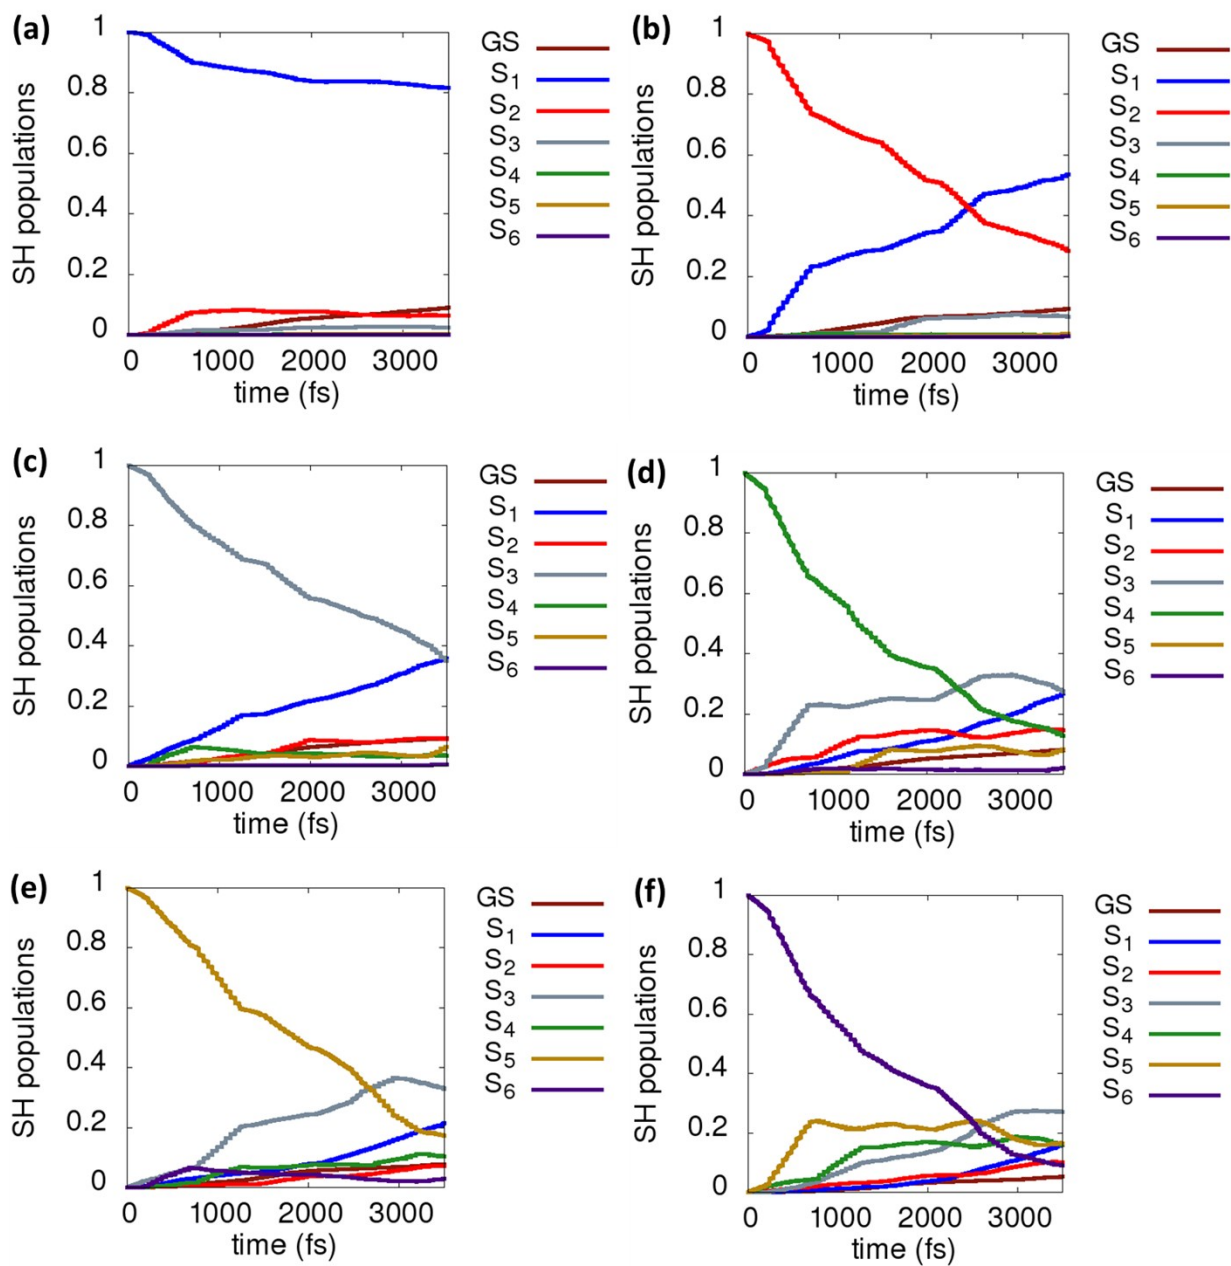

**Figure S8.** Evolution of the populations of the  $S_1$ ,  $S_2$ ,  $S_3$ ,  $S_4$ ,  $S_5$ ,  $S_6$  states for  $[\text{Au}_{25}(\text{MPA})_{18}]^{-1}$  without the energy correction. Panels a–f are relaxations from  $S_1$  to  $S_6$ , respectively.



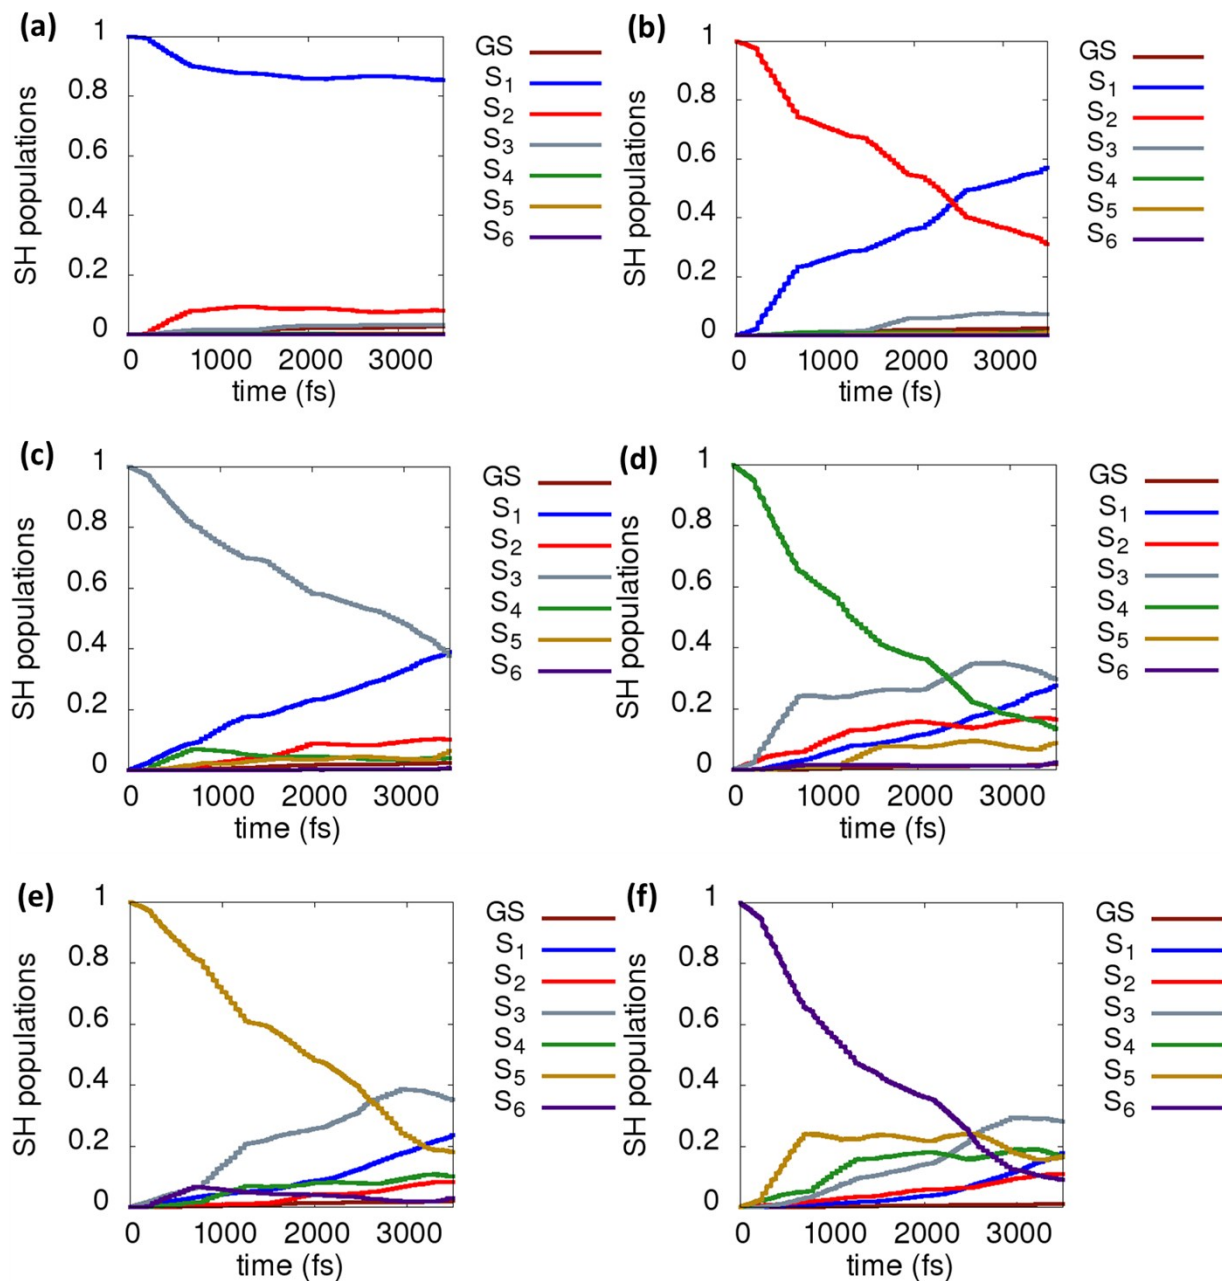

**Figure S9.** Evolution of the populations of the S<sub>1</sub>, S<sub>2</sub>, S<sub>3</sub>, S<sub>4</sub>, S<sub>5</sub>, S<sub>6</sub> states for [Au<sub>25</sub>(MPA)<sub>18</sub>]<sup>-1</sup> with the 0.55 eV energy correction. Panels a–f are relaxations from S<sub>1</sub> to S<sub>6</sub>, respectively.

**Table S3.** GS growth times calculated for ligated clusters with the 0.55 eV energy correction.

| Excited state  | GS growth times (ps) with correction |                 |                               |                               |     |     |
|----------------|--------------------------------------|-----------------|-------------------------------|-------------------------------|-----|-----|
|                | H                                    | CH <sub>3</sub> | C <sub>2</sub> H <sub>5</sub> | C <sub>3</sub> H <sub>7</sub> | MPA | PET |
| S <sub>1</sub> | 313                                  | 77              | 129                           | 102                           | 99  | 118 |
| S <sub>2</sub> | 365                                  | 105             | 136                           | 139                           | 175 | 128 |
| S <sub>3</sub> | 441                                  | 168             | 184                           | 207                           | 128 | 140 |
| S <sub>4</sub> | 690                                  | 258             | 257                           | 277                           | 298 | 212 |
| S <sub>5</sub> | 750                                  | 215             | 476                           | 184                           | 188 | 176 |
| S <sub>6</sub> | 1429                                 | 477             | 566                           | 473                           | 395 | 346 |

**Table S4.** Decay times calculated for ligated clusters with the 0.55 eV energy correction.

| Excited state  | Decay times (ps) with correction |                 |                               |                               |     |     |
|----------------|----------------------------------|-----------------|-------------------------------|-------------------------------|-----|-----|
|                | H                                | CH <sub>3</sub> | C <sub>2</sub> H <sub>5</sub> | C <sub>3</sub> H <sub>7</sub> | MPA | PET |
| S <sub>1</sub> | 18                               | 18              | 22                            | 18                            | 12  | 16  |
| S <sub>2</sub> | 3.3                              | 7.4             | 7.0                           | 5.9                           | 4.5 | 3.1 |
| S <sub>3</sub> | 3.1                              | 7.8             | 4.6                           | 4.6                           | 2.9 | 3.9 |
| S <sub>4</sub> | 1.9                              | 4.7             | 3.2                           | 2.7                           | 2.2 | 1.9 |
| S <sub>5</sub> | 2.6                              | 4.9             | 3.5                           | 2.3                           | 2.4 | 2.6 |
| S <sub>6</sub> | 1.9                              | 3.8             | 2.7                           | 1.9                           | 2.1 | 1.7 |

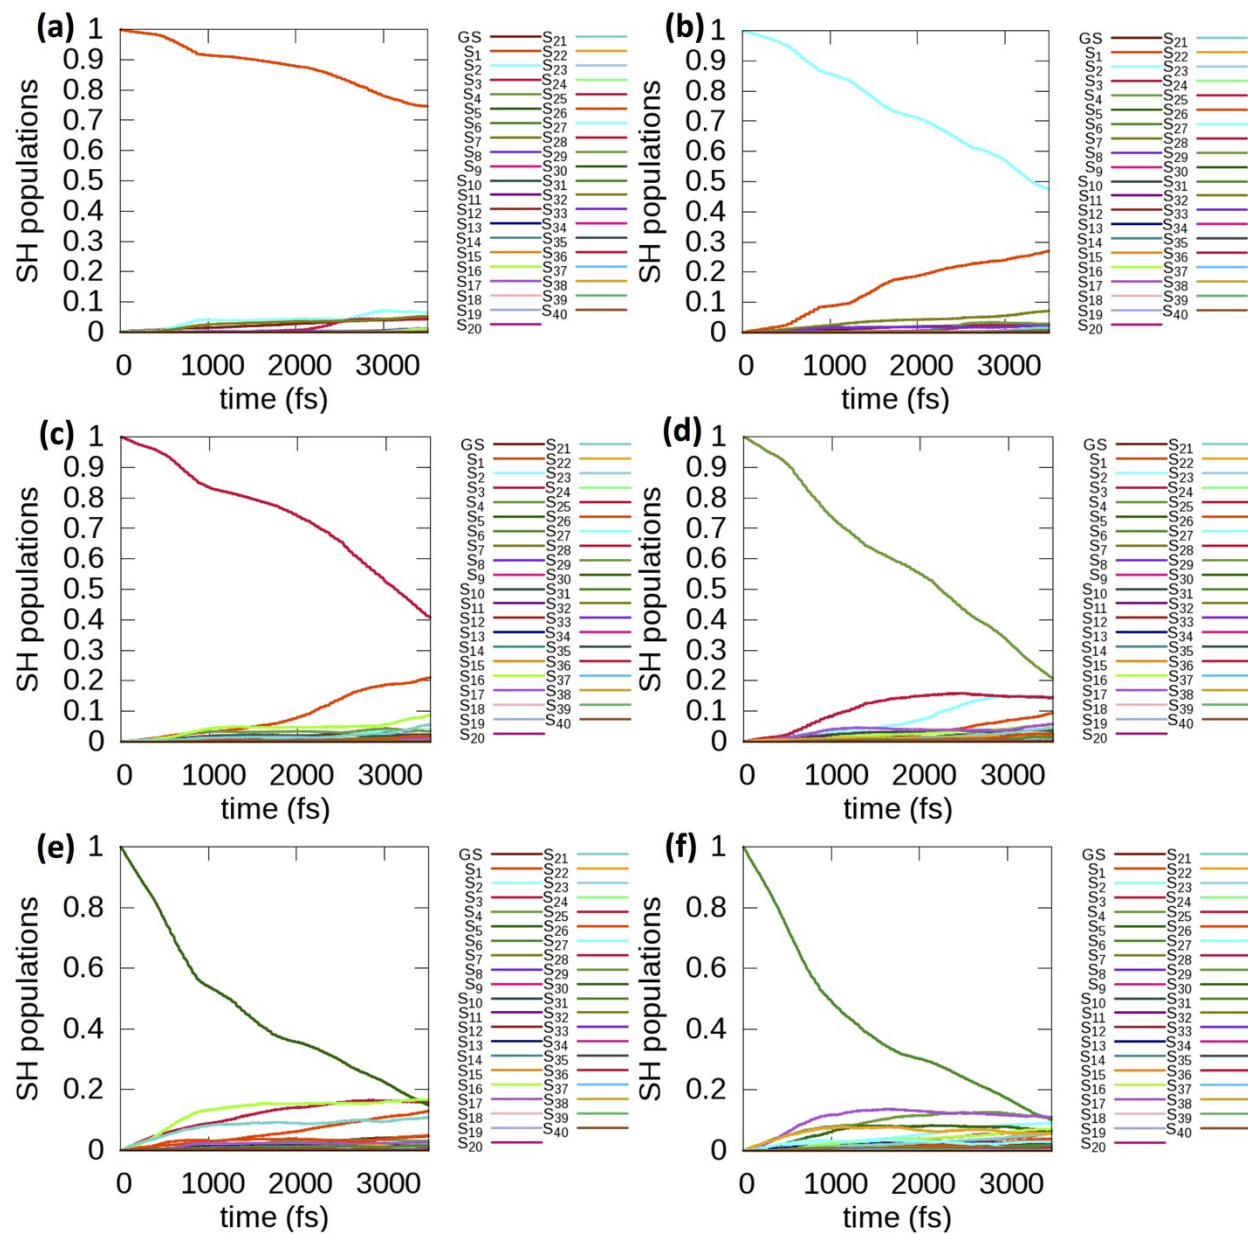

**Figure S10.** Evolution of the populations of states initially excited into  $S_1$ ,  $S_2$ ,  $S_3$ ,  $S_4$ ,  $S_5$ ,  $S_6$  (a-f, respectively) for  $[\text{Au}_{25}(\text{SCH}_3)_{18}]^{-1}$  with the 0.55 eV energy correction in the presence of higher excited states.

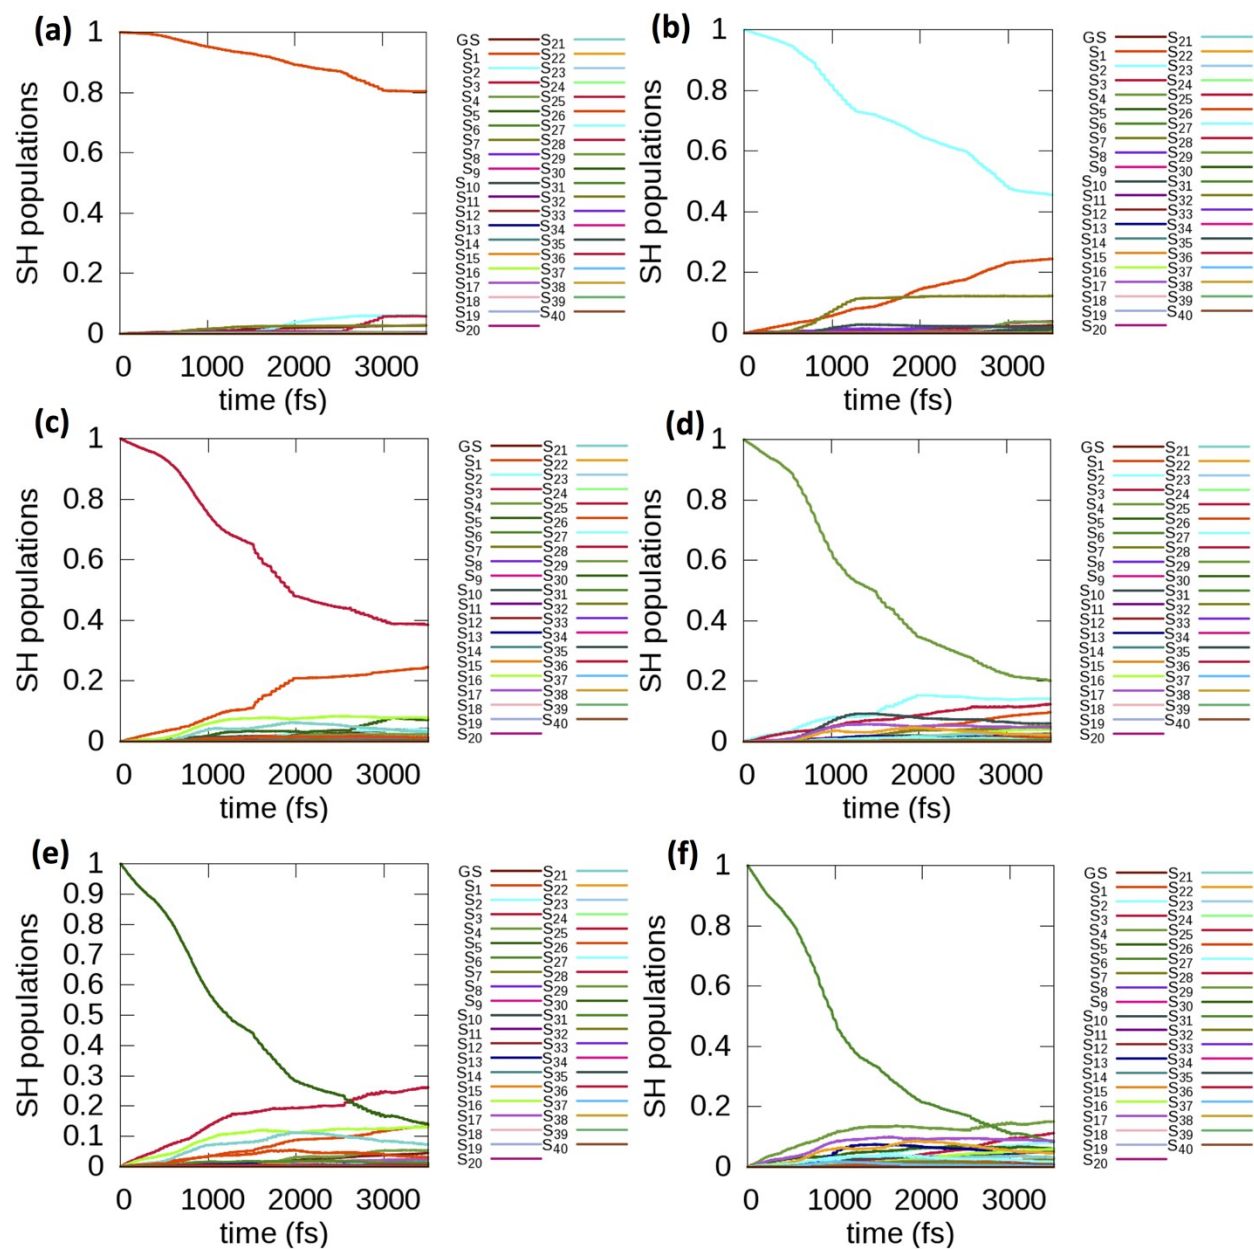

**Figure S11.** Evolution of the populations of states initially excited into S<sub>1</sub>, S<sub>2</sub>, S<sub>3</sub>, S<sub>4</sub>, S<sub>5</sub>, S<sub>6</sub> (a-f, respectively) for  $[\text{Au}_{25}(\text{SC}_2\text{H}_5)_{18}]^{-1}$  with the 0.55 eV energy correction in the presence of higher excited states.

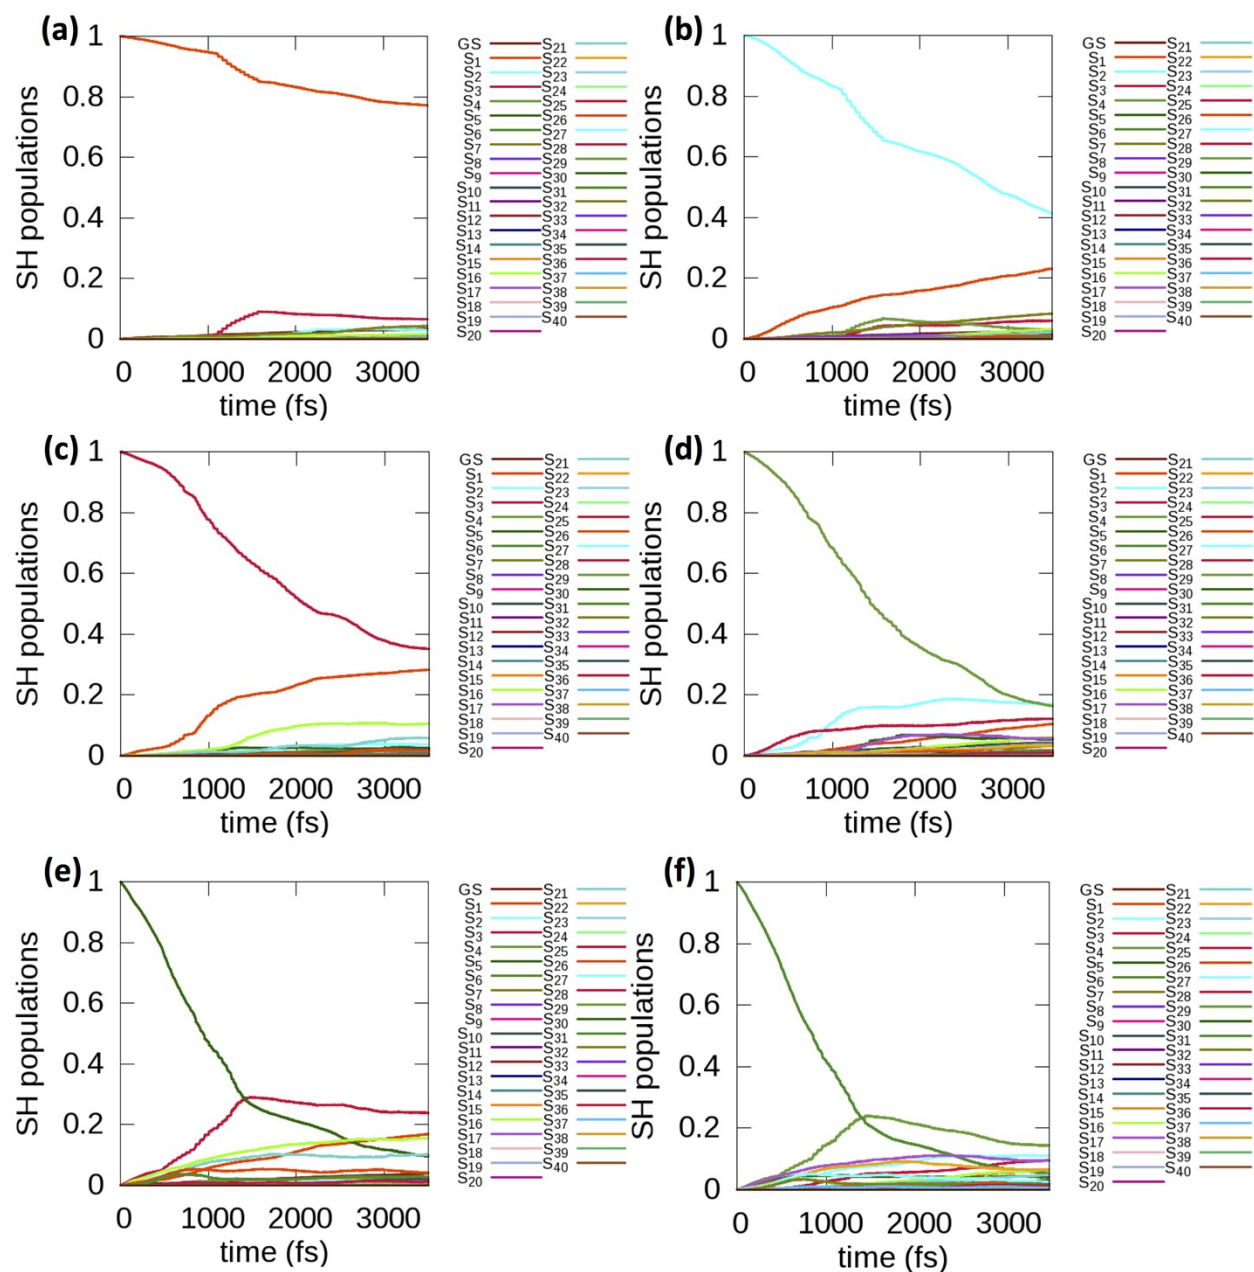

**Figure S12.** Evolution of the populations of states initially excited into S<sub>1</sub>, S<sub>2</sub>, S<sub>3</sub>, S<sub>4</sub>, S<sub>5</sub>, S<sub>6</sub> (a-f, respectively) for  $[\text{Au}_{25}(\text{SC}_3\text{H}_7)_{18}]^{-1}$  with the 0.55 eV energy correction in the presence of higher excited states.

**Table S5.** Decay time constants obtained for  $[\text{Au}_{25}(\text{SR})_{18}]^{-1}$  ( $\text{R} = \text{CH}_3, \text{C}_2\text{H}_5, \text{C}_3\text{H}_7, \text{MPA}, \text{PET}$ ) nanoclusters for  $\text{S}_1$ - $\text{S}_{40}$  states. The subscript “a” – The PET decay times were calculated without adding the 0.55 eV correction to the  $\text{S}_1$ - $\text{S}_6$  states.

| Decay time (ps)       |        |       |        |     |                  |
|-----------------------|--------|-------|--------|-----|------------------|
| Excited state         | methyl | ethyl | propyl | MPA | PET <sup>a</sup> |
| <b>S<sub>1</sub></b>  | 14     | 17    | 12     | 11  | 14               |
| <b>S<sub>2</sub></b>  | 5.6    | 4.6   | 4.2    | 2.8 | 2.9              |
| <b>S<sub>3</sub></b>  | 5.8    | 3.2   | 3.3    | 2.0 | 3.9              |
| <b>S<sub>4</sub></b>  | 3.1    | 2.1   | 2.1    | 1.5 | 1.9              |
| <b>S<sub>5</sub></b>  | 1.9    | 1.8   | 1.3    | 1.0 | 2.8              |
| <b>S<sub>6</sub></b>  | 1.6    | 1.4   | 1.1    | 0.9 | 1.7              |
| <b>S<sub>7</sub></b>  | 8.0    | 13    | 11     | 8.6 | 8.3              |
| <b>S<sub>8</sub></b>  | 1.6    | 2.0   | 2.0    | 1.9 | 2.3              |
| <b>S<sub>9</sub></b>  | 1.4    | 1.6   | 1.4    | 1.1 | 2.2              |
| <b>S<sub>10</sub></b> | 3.7    | 3.7   | 3.8    | 2.3 | 2.7              |
| <b>S<sub>11</sub></b> | 1.4    | 1.3   | 1.4    | 1.3 | 1.4              |
| <b>S<sub>12</sub></b> | 1.5    | 1.2   | 1.1    | 0.9 | 1.7              |
| <b>S<sub>13</sub></b> | 3.7    | 3.3   | 2.3    | 1.5 | 2.4              |
| <b>S<sub>14</sub></b> | 1.5    | 1.5   | 1.2    | 0.8 | 1.4              |
| <b>S<sub>15</sub></b> | 1.5    | 1.1   | 1.0    | 0.7 | 1.5              |
| <b>S<sub>16</sub></b> | 3.5    | 2.4   | 3.9    | 4.1 | 2.6              |
| <b>S<sub>17</sub></b> | 2.3    | 2.2   | 2.7    | 2.3 | 1.5              |
| <b>S<sub>18</sub></b> | 2.2    | 2.1   | 2.6    | 2.2 | 2.3              |
| <b>S<sub>19</sub></b> | 1.0    | 1.0   | 1.3    | 0.9 | 1.2              |
| <b>S<sub>20</sub></b> | 1.1    | 0.9   | 1.0    | 0.7 | 1.2              |
| <b>S<sub>21</sub></b> | 1.8    | 1.3   | 1.6    | 1.4 | 1.3              |
| <b>S<sub>22</sub></b> | 1.3    | 1.3   | 1.3    | 1.2 | 0.9              |
| <b>S<sub>23</sub></b> | 1.4    | 1.2   | 1.5    | 0.9 | 1.2              |
| <b>S<sub>24</sub></b> | 0.7    | 0.6   | 0.8    | 0.6 | 0.8              |
| <b>S<sub>25</sub></b> | 0.8    | 0.6   | 0.6    | 0.5 | 0.8              |
| <b>S<sub>26</sub></b> | 1.0    | 1.0   | 1.0    | 1.1 | 0.9              |
| <b>S<sub>27</sub></b> | 0.8    | 0.9   | 0.9    | 0.9 | 0.7              |
| <b>S<sub>28</sub></b> | 0.9    | 1.0   | 0.9    | 0.9 | 0.9              |
| <b>S<sub>29</sub></b> | 0.6    | 0.6   | 0.6    | 0.6 | 0.6              |
| <b>S<sub>30</sub></b> | 0.7    | 0.6   | 0.5    | 0.5 | 0.7              |
| <b>S<sub>31</sub></b> | 0.9    | 1.0   | 0.8    | 0.9 | 0.7              |
| <b>S<sub>32</sub></b> | 0.8    | 1.1   | 0.8    | 0.9 | 0.6              |
| <b>S<sub>33</sub></b> | 0.8    | 1.0   | 0.8    | 0.7 | 0.8              |

|          |     |     |     |     |     |
|----------|-----|-----|-----|-----|-----|
| $S_{34}$ | 0.6 | 0.6 | 0.6 | 0.5 | 0.6 |
| $S_{35}$ | 0.7 | 0.6 | 0.5 | 0.4 | 0.6 |
| $S_{36}$ | 1.2 | 1.0 | 1.0 | 0.7 | 0.7 |
| $S_{37}$ | 1.1 | 0.9 | 0.9 | 0.7 | 0.6 |
| $S_{38}$ | 1.2 | 0.9 | 0.9 | 0.6 | 0.7 |
| $S_{39}$ | 0.8 | 0.6 | 0.7 | 0.4 | 0.6 |
| $S_{40}$ | 0.9 | 0.6 | 0.6 | 0.4 | 0.6 |

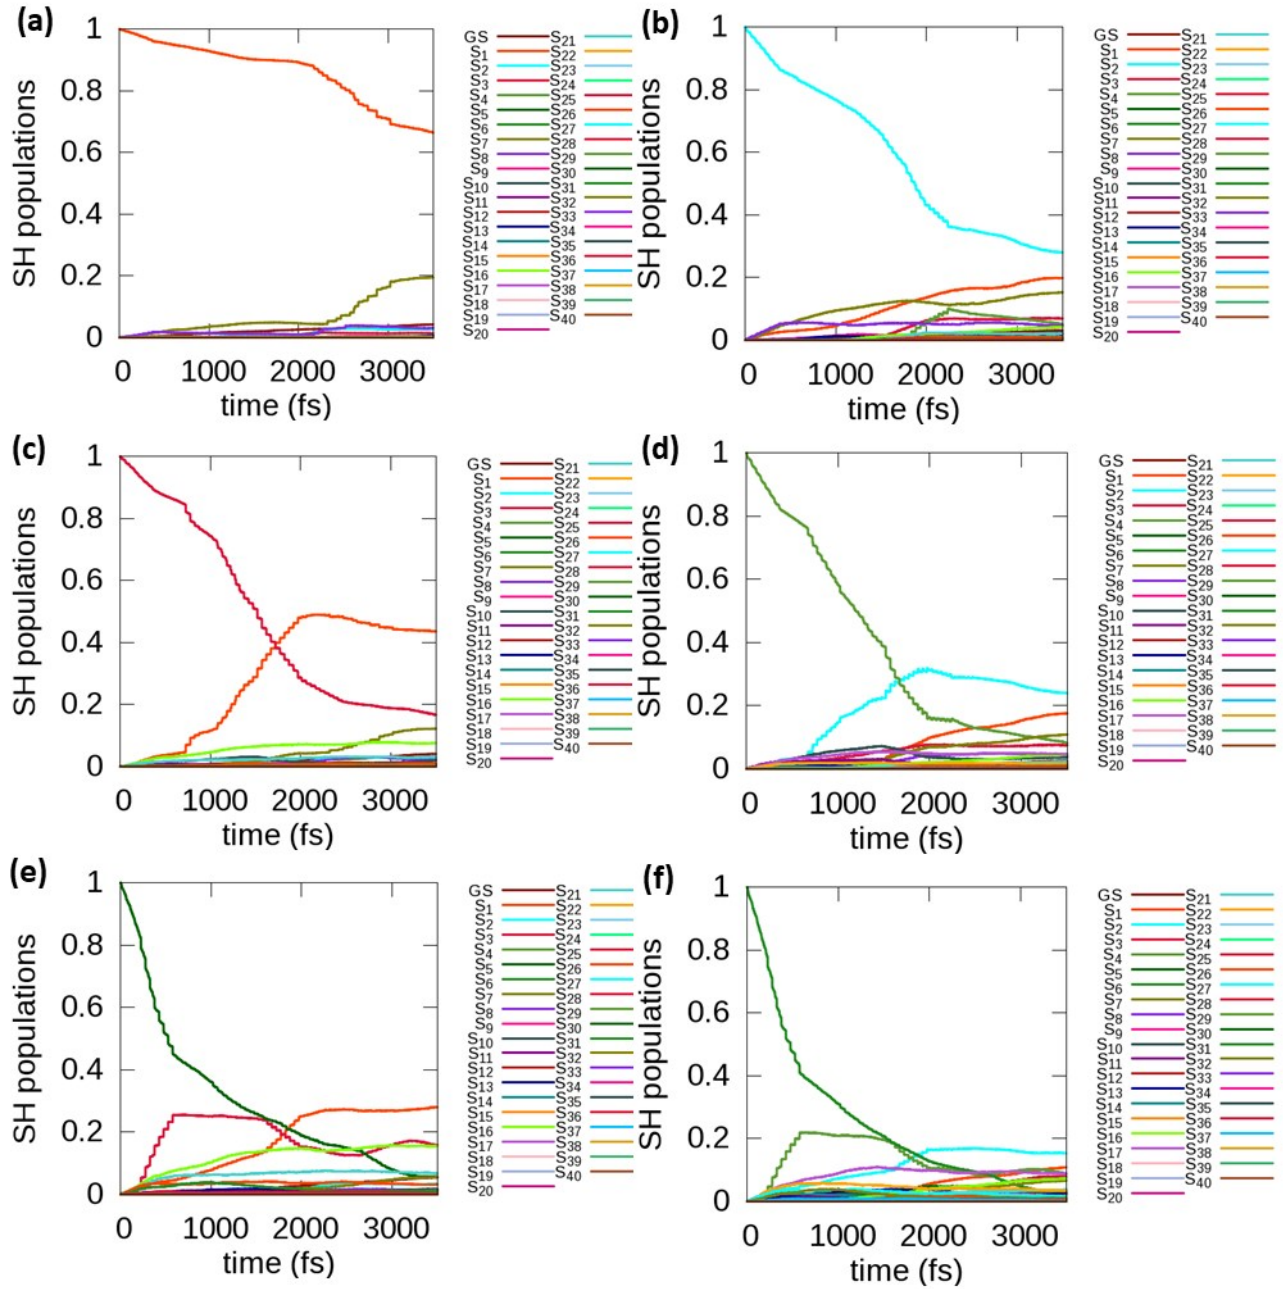

**Figure S13.** Evolution of the populations of states initially excited into  $S_1, S_2, S_3, S_4, S_5, S_6$  (a-f, respectively) for  $[\text{Au}_{25}(\text{MPA})_{18}]^{-1}$  with the 0.55 eV energy correction in the presence of higher excited states.

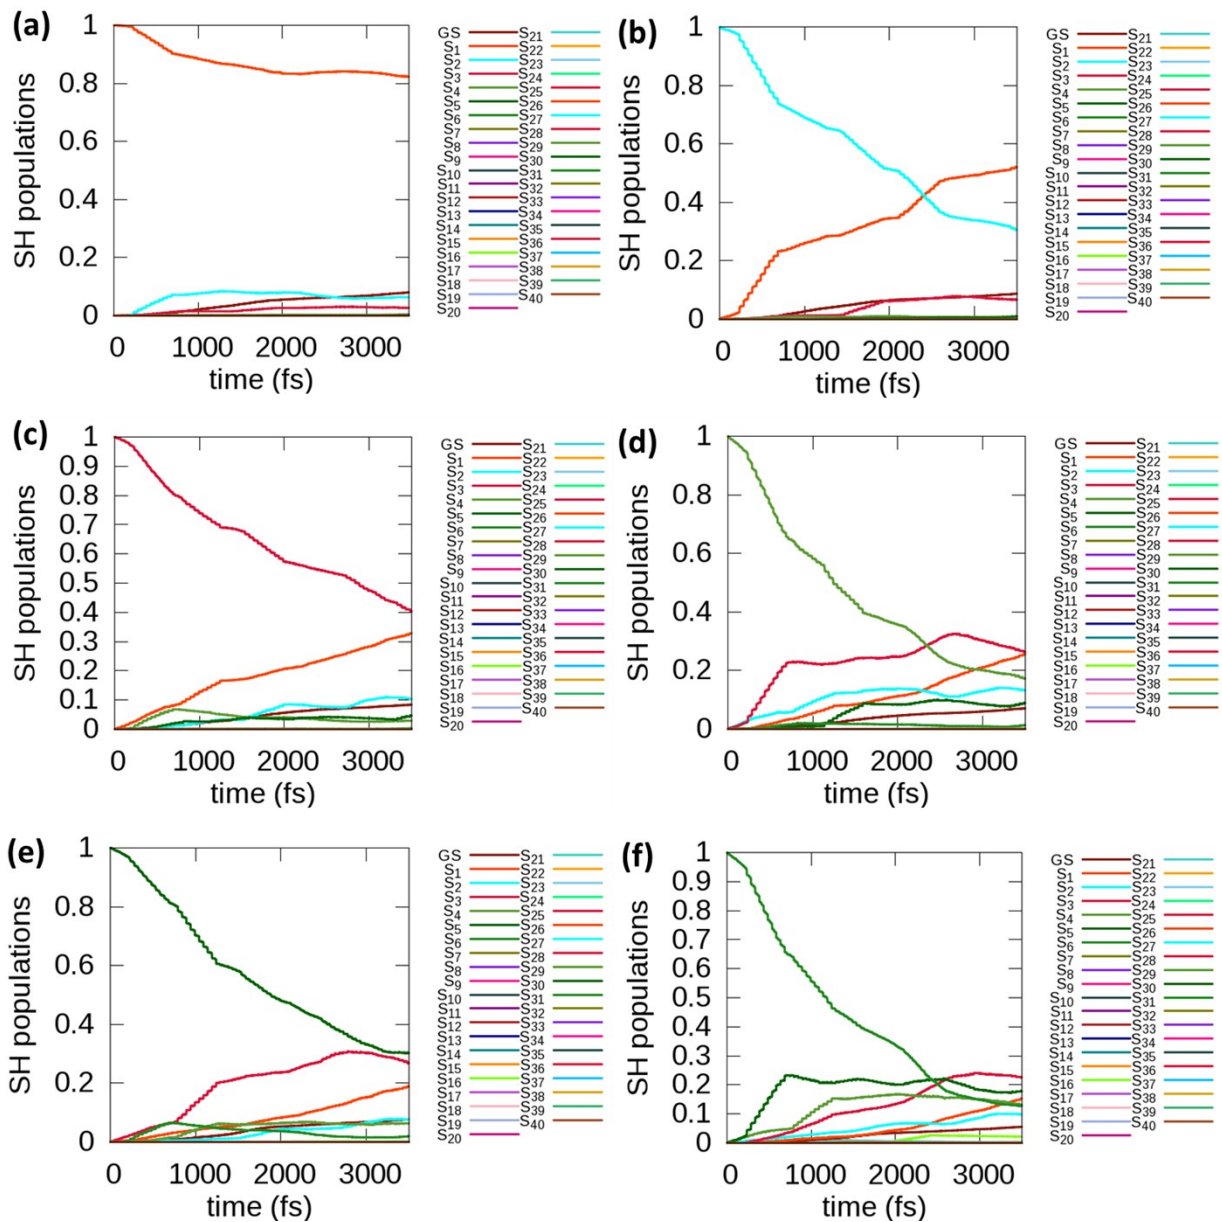

**Figure S14.** Evolution of the populations of states initially excited into  $S_1, S_2, S_3, S_4, S_5, S_6$  (a-f, respectively) for  $[\text{Au}_{25}(\text{PET})_{18}]^{-1}$  (without the 0.55 eV energy correction) in the presence of higher excited states



**Table S6.** Excited states considered during separate electron and hole relaxations.

| <b>Excited state</b>  | <b>Transition</b> | <b>Excited state</b>  | <b>Transition</b> |
|-----------------------|-------------------|-----------------------|-------------------|
| <b>S<sub>1</sub></b>  | HOMO → LUMO       | <b>S<sub>21</sub></b> | HOMO-4 → LUMO     |
| <b>S<sub>2</sub></b>  | HOMO → LUMO+1     | <b>S<sub>22</sub></b> | HOMO-4 → LUMO+1   |
| <b>S<sub>3</sub></b>  | HOMO → LUMO+2     | <b>S<sub>23</sub></b> | HOMO-4 → LUMO+2   |
| <b>S<sub>4</sub></b>  | HOMO → LUMO+3     | <b>S<sub>24</sub></b> | HOMO-4 → LUMO+3   |
| <b>S<sub>5</sub></b>  | HOMO → LUMO+4     | <b>S<sub>25</sub></b> | HOMO-4 → LUMO+4   |
| <b>S<sub>6</sub></b>  | HOMO-1 → LUMO     | <b>S<sub>26</sub></b> | HOMO-5 → LUMO     |
| <b>S<sub>7</sub></b>  | HOMO-1 → LUMO+1   | <b>S<sub>27</sub></b> | HOMO-5 → LUMO+1   |
| <b>S<sub>8</sub></b>  | HOMO-1 → LUMO+2   | <b>S<sub>28</sub></b> | HOMO-5 → LUMO+2   |
| <b>S<sub>9</sub></b>  | HOMO-1 → LUMO+3   | <b>S<sub>29</sub></b> | HOMO-5 → LUMO+3   |
| <b>S<sub>10</sub></b> | HOMO-1 → LUMO+4   | <b>S<sub>30</sub></b> | HOMO-5 → LUMO+4   |
| <b>S<sub>11</sub></b> | HOMO-2 → LUMO     | <b>S<sub>31</sub></b> | HOMO-6 → LUMO     |
| <b>S<sub>12</sub></b> | HOMO-2 → LUMO+1   | <b>S<sub>32</sub></b> | HOMO-6 → LUMO+1   |
| <b>S<sub>13</sub></b> | HOMO-2 → LUMO+2   | <b>S<sub>33</sub></b> | HOMO-6 → LUMO+2   |
| <b>S<sub>14</sub></b> | HOMO-2 → LUMO+3   | <b>S<sub>34</sub></b> | HOMO-6 → LUMO+3   |
| <b>S<sub>15</sub></b> | HOMO-2 → LUMO+4   | <b>S<sub>35</sub></b> | HOMO-6 → LUMO+4   |
| <b>S<sub>16</sub></b> | HOMO-3 → LUMO     | <b>S<sub>36</sub></b> | HOMO-7 → LUMO     |
| <b>S<sub>17</sub></b> | HOMO-3 → LUMO+1   | <b>S<sub>37</sub></b> | HOMO-7 → LUMO+1   |
| <b>S<sub>18</sub></b> | HOMO-3 → LUMO+2   | <b>S<sub>38</sub></b> | HOMO-7 → LUMO+2   |
| <b>S<sub>19</sub></b> | HOMO-3 → LUMO+3   | <b>S<sub>39</sub></b> | HOMO-7 → LUMO+3   |
| <b>S<sub>20</sub></b> | HOMO-3 → LUMO+4   | <b>S<sub>40</sub></b> | HOMO-7 → LUMO+4   |

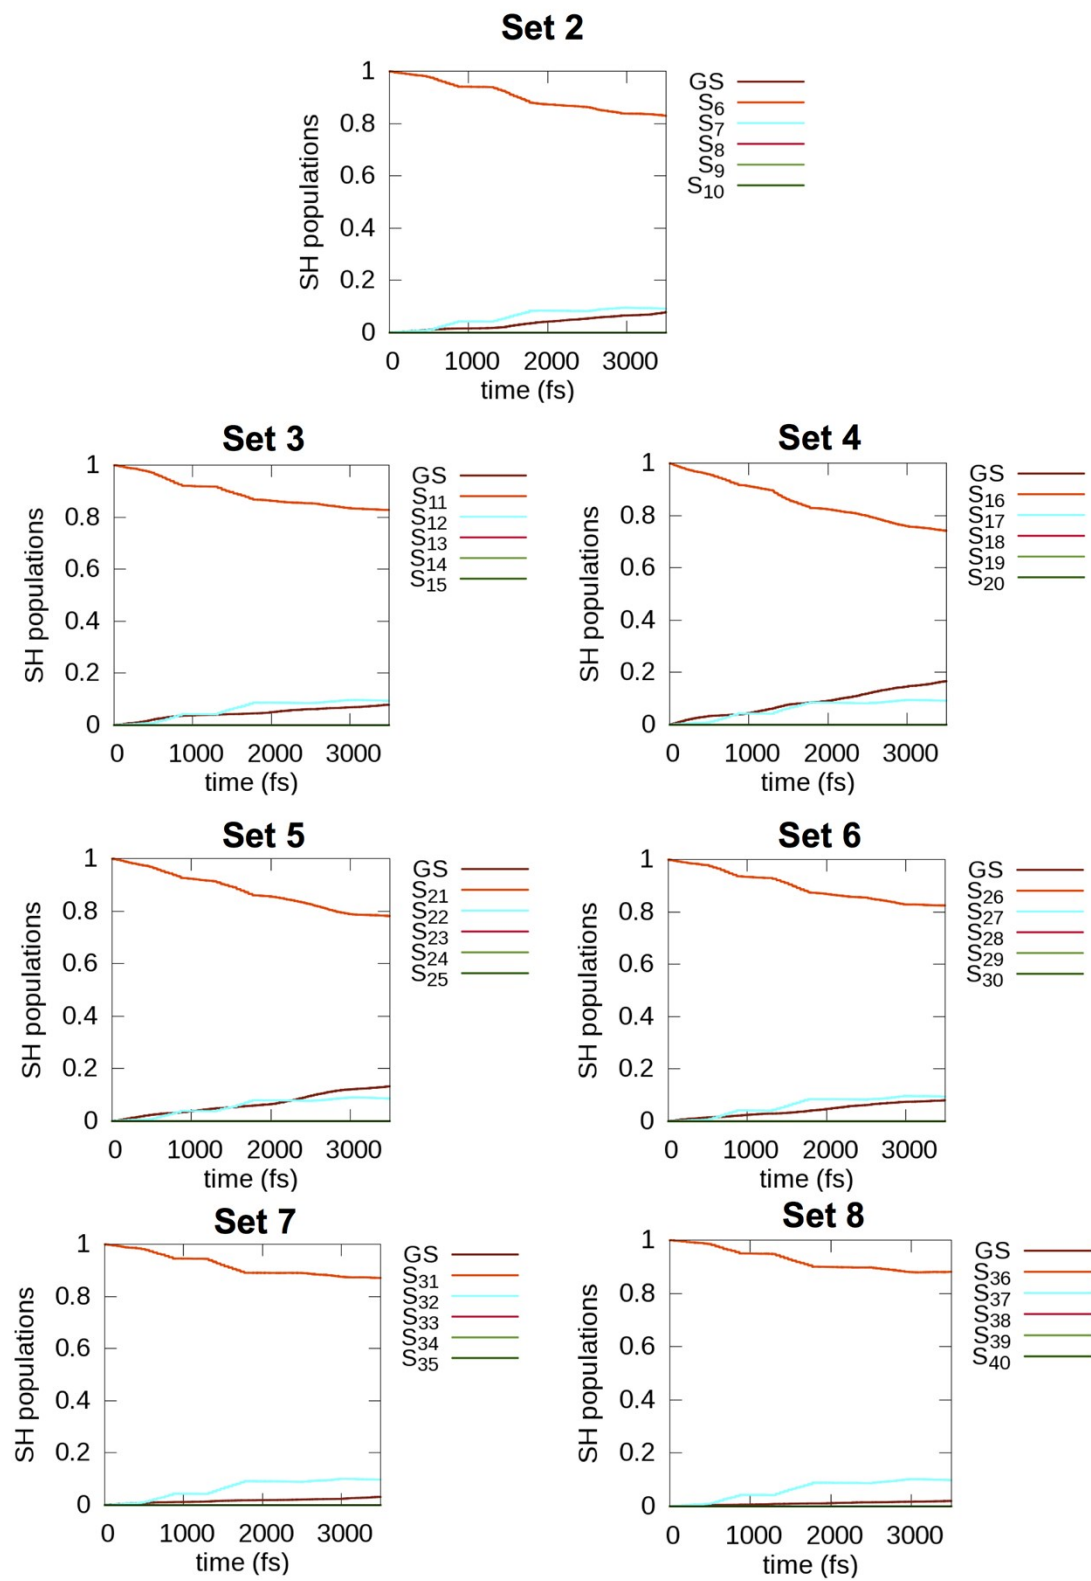

**Figure S15.** Evolution of the populations of  $S_6$ ,  $S_{11}$ ,  $S_{16}$ ,  $S_{21}$ ,  $S_{26}$ ,  $S_{31}$ ,  $S_{36}$  states from the set 2 to set 8 electron relaxations respectively in  $[\text{Au}_{25}(\text{SCH}_3)_{18}]^{-1}$ .

**Table S7.** Calculated decay time constants for the eight electron relaxation sets.

| Excited state                         | Transition      | Decay time (ps) - Trial 1 | Decay time (ps) - Trial 2 |
|---------------------------------------|-----------------|---------------------------|---------------------------|
| <b>set 1 (hole created in HOMO)</b>   |                 |                           |                           |
| S <sub>1</sub>                        | HOMO → LUMO     | 13                        | 13                        |
| S <sub>2</sub>                        | HOMO → LUMO+1   | 6.9                       | 7.1                       |
| S <sub>3</sub>                        | HOMO → LUMO+2   | 6.9                       | 6.7                       |
| S <sub>4</sub>                        | HOMO → LUMO+3   | 1.7                       | 1.7                       |
| S <sub>5</sub>                        | HOMO → LUMO+4   | 1.8                       | 1.8                       |
| <b>set 2 (hole created in HOMO-1)</b> |                 |                           |                           |
| S <sub>6</sub>                        | HOMO-1 → LUMO   | 17                        | 17                        |
| S <sub>7</sub>                        | HOMO-1 → LUMO+1 | 8.6                       | 8.6                       |
| S <sub>8</sub>                        | HOMO-1 → LUMO+2 | 6.9                       | 6.7                       |
| S <sub>9</sub>                        | HOMO-1 → LUMO+3 | 1.7                       | 1.7                       |
| S <sub>10</sub>                       | HOMO-1 → LUMO+4 | 1.8                       | 1.8                       |
| <b>set 3 (hole created in HOMO-2)</b> |                 |                           |                           |
| S <sub>11</sub>                       | HOMO-2 → LUMO   | 16                        | 16                        |
| S <sub>12</sub>                       | HOMO-2 → LUMO+1 | 8.7                       | 8.7                       |
| S <sub>13</sub>                       | HOMO-2 → LUMO+2 | 6.9                       | 6.9                       |
| S <sub>14</sub>                       | HOMO-2 → LUMO+3 | 1.7                       | 1.7                       |
| S <sub>15</sub>                       | HOMO-2 → LUMO+4 | 1.8                       | 1.8                       |
| <b>set 4 (hole created in HOMO-3)</b> |                 |                           |                           |
| S <sub>16</sub>                       | HOMO-3 → LUMO   | 11                        | 11                        |
| S <sub>17</sub>                       | HOMO-3 → LUMO+1 | 7.9                       | 7.7                       |
| S <sub>18</sub>                       | HOMO-3 → LUMO+2 | 6.7                       | 6.8                       |
| S <sub>19</sub>                       | HOMO-3 → LUMO+3 | 1.7                       | 1.7                       |
| S <sub>20</sub>                       | HOMO-3 → LUMO+4 | 1.7                       | 1.7                       |
| <b>set 5 (hole created in HOMO-4)</b> |                 |                           |                           |
| S <sub>21</sub>                       | HOMO-4 → LUMO   | 13                        | 13                        |
| S <sub>22</sub>                       | HOMO-4 → LUMO+1 | 8.7                       | 8.5                       |
| S <sub>23</sub>                       | HOMO-4 → LUMO+2 | 6.6                       | 6.5                       |
| S <sub>24</sub>                       | HOMO-4 → LUMO+3 | 1.7                       | 1.7                       |
| S <sub>25</sub>                       | HOMO-4 → LUMO+4 | 1.8                       | 1.7                       |
| <b>set 6 (hole created in HOMO-5)</b> |                 |                           |                           |
| S <sub>26</sub>                       | HOMO-5 → LUMO   | 16                        | 16                        |
| S <sub>27</sub>                       | HOMO-5 → LUMO+1 | 9.2                       | 9.5                       |
| S <sub>28</sub>                       | HOMO-5 → LUMO+2 | 6.4                       | 6.6                       |
| S <sub>29</sub>                       | HOMO-5 → LUMO+3 | 1.7                       | 1.7                       |
| S <sub>30</sub>                       | HOMO-5 → LUMO+4 | 1.7                       | 1.7                       |
| <b>set 7 (hole created in HOMO-6)</b> |                 |                           |                           |
| S <sub>31</sub>                       | HOMO-6 → LUMO   | 21                        | 21                        |

|                                       |                             |     |     |
|---------------------------------------|-----------------------------|-----|-----|
| $S_{32}$                              | HOMO-6 $\rightarrow$ LUMO+1 | 9.5 | 9.6 |
| $S_{33}$                              | HOMO-6 $\rightarrow$ LUMO+2 | 6.5 | 6.5 |
| $S_{34}$                              | HOMO-6 $\rightarrow$ LUMO+3 | 1.6 | 1.6 |
| $S_{35}$                              | HOMO-6 $\rightarrow$ LUMO+4 | 1.7 | 1.7 |
| <b>set 8 (hole created in HOMO-7)</b> |                             |     |     |
| $S_{36}$                              | HOMO-7 $\rightarrow$ LUMO   | 23  | 23  |
| $S_{37}$                              | HOMO-7 $\rightarrow$ LUMO+1 | 9.8 | 10  |
| $S_{38}$                              | HOMO-7 $\rightarrow$ LUMO+2 | 6.1 | 6.2 |
| $S_{39}$                              | HOMO-7 $\rightarrow$ LUMO+3 | 1.6 | 1.6 |
| $S_{40}$                              | HOMO-7 $\rightarrow$ LUMO+4 | 1.6 | 1.7 |

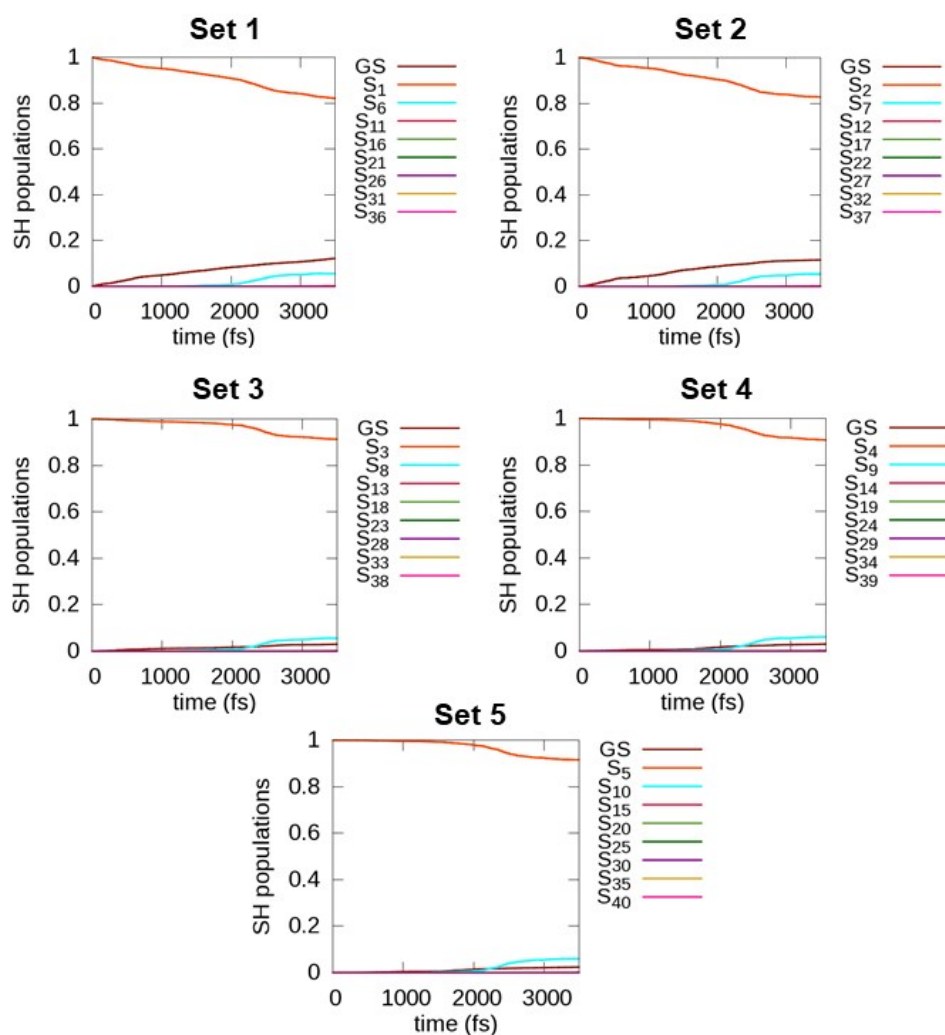

**Figure S16.** Evolution of the populations of  $S_1$ ,  $S_2$ ,  $S_3$ ,  $S_4$ ,  $S_5$  states from the set 1 to set 5 hole relaxations, respectively, in  $[\text{Au}_{25}(\text{SCH}_3)_{18}]^{-1}$ .

**Table S8.** Calculated decay time constants for the five hole relaxation sets.

| Excited state                               | Transition      | Decay time (ps)<br>-Trial 1 | Decay time (ps)<br>-Trial 2 |
|---------------------------------------------|-----------------|-----------------------------|-----------------------------|
| <b>set 1 (electron excited into LUMO)</b>   |                 |                             |                             |
| S <sub>1</sub>                              | HOMO → LUMO     | 18                          | 20                          |
| S <sub>6</sub>                              | HOMO-1 → LUMO   | 8.9                         | 8.7                         |
| S <sub>11</sub>                             | HOMO-2 → LUMO   | 5.7                         | 5.6                         |
| S <sub>16</sub>                             | HOMO-3 → LUMO   | 2.7                         | 2.7                         |
| S <sub>21</sub>                             | HOMO-4 → LUMO   | 1.6                         | 1.6                         |
| S <sub>26</sub>                             | HOMO-5 → LUMO   | 1.0                         | 1.0                         |
| S <sub>31</sub>                             | HOMO-6 → LUMO   | 1.0                         | 1.0                         |
| S <sub>36</sub>                             | HOMO-7 → LUMO   | 1.3                         | 1.3                         |
| <b>set 2 (electron excited into LUMO+1)</b> |                 |                             |                             |
| S <sub>2</sub>                              | HOMO → LUMO+1   | 18                          | 17                          |
| S <sub>7</sub>                              | HOMO-1 → LUMO+1 | 9.5                         | 9.4                         |
| S <sub>12</sub>                             | HOMO-2 → LUMO+1 | 6.3                         | 6.1                         |
| S <sub>17</sub>                             | HOMO-3 → LUMO+1 | 3.0                         | 2.9                         |
| S <sub>22</sub>                             | HOMO-4 → LUMO+1 | 1.7                         | 1.7                         |
| S <sub>27</sub>                             | HOMO-5 → LUMO+1 | 1.0                         | 1.0                         |
| S <sub>32</sub>                             | HOMO-6 → LUMO+1 | 1.0                         | 1.0                         |
| S <sub>37</sub>                             | HOMO-7 → LUMO+1 | 1.3                         | 1.3                         |
| <b>set 3 (electron excited into LUMO+2)</b> |                 |                             |                             |
| S <sub>3</sub>                              | HOMO → LUMO+2   | 46                          | 45                          |
| S <sub>8</sub>                              | HOMO-1 → LUMO+2 | 11                          | 11                          |
| S <sub>13</sub>                             | HOMO-2 → LUMO+2 | 6.5                         | 6.4                         |
| S <sub>18</sub>                             | HOMO-3 → LUMO+2 | 3.1                         | 3.0                         |
| S <sub>23</sub>                             | HOMO-4 → LUMO+2 | 1.8                         | 1.7                         |
| S <sub>28</sub>                             | HOMO-5 → LUMO+2 | 1.0                         | 1.0                         |
| S <sub>33</sub>                             | HOMO-6 → LUMO+2 | 1.0                         | 1.0                         |
| S <sub>38</sub>                             | HOMO-7 → LUMO+2 | 1.3                         | 1.3                         |
| <b>set 4 (electron excited into LUMO+3)</b> |                 |                             |                             |
| S <sub>4</sub>                              | HOMO → LUMO+3   | 44                          | 42                          |
| S <sub>8</sub>                              | HOMO-1 → LUMO+3 | 10                          | 11                          |
| S <sub>14</sub>                             | HOMO-2 → LUMO+3 | 6.7                         | 6.6                         |
| S <sub>18</sub>                             | HOMO-3 → LUMO+3 | 3.0                         | 3.0                         |
| S <sub>24</sub>                             | HOMO-4 → LUMO+3 | 1.7                         | 1.7                         |
| S <sub>28</sub>                             | HOMO-5 → LUMO+3 | 1.0                         | 1.0                         |
| S <sub>34</sub>                             | HOMO-6 → LUMO+3 | 1.0                         | 0.9                         |
| S <sub>38</sub>                             | HOMO-7 → LUMO+3 | 1.2                         | 1.3                         |
| <b>set 5 (electron excited into LUMO+4)</b> |                 |                             |                             |
| S <sub>5</sub>                              | HOMO → LUMO+4   | 49                          | 48                          |
| S <sub>10</sub>                             | HOMO-1 → LUMO+4 | 11                          | 11                          |

|                 |                 |     |     |
|-----------------|-----------------|-----|-----|
| S <sub>15</sub> | HOMO-2 → LUMO+4 | 6.4 | 6.5 |
| S <sub>20</sub> | HOMO-3 → LUMO+4 | 2.9 | 2.9 |
| S <sub>25</sub> | HOMO-4 → LUMO+4 | 1.6 | 1.7 |
| S <sub>30</sub> | HOMO-5 → LUMO+4 | 1.0 | 1.0 |
| S <sub>35</sub> | HOMO-6 → LUMO+4 | 1.0 | 1.0 |
| S <sub>40</sub> | HOMO-7 → LUMO+4 | 1.2 | 1.2 |
